# Supplementary material for: Progesterone Receptor Expression Declines in the Guinea Pig Uterus during Functional Progesterone Withdrawal and in Response to Prostaglandins
Source: PubMed Central journal article supplement (PMC4144885; doi:10.1371/journal.pone.0105253), 2014-08-26
Supplement: pone.0105253.s001.pdf [file pone.0105253.s001.pdf]

**Figure S1**  
**Immunoblot Detection of Progesterone Receptor (PRA and PRB) Protein**  
**in Guinea Pig Uterus**

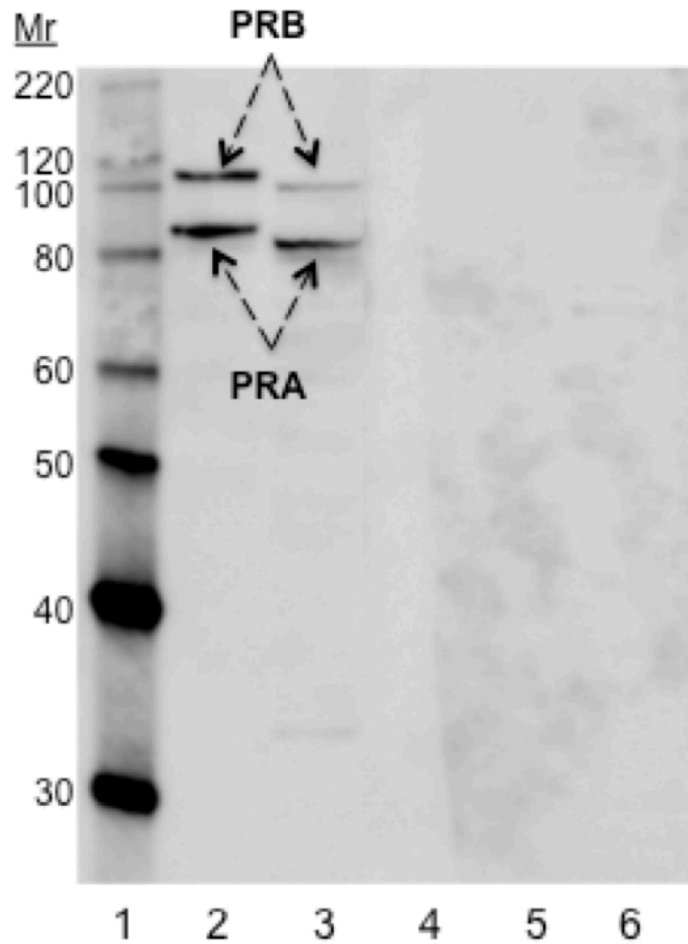

Lane Assignments:

- 1: Mr markers
- 2: T47D cell extract, positive control
- 3: Uterine tissue extract
- 4: Empty lane
- 5: T47D cell extract with immunising peptide competition
- 6: Uterine tissue extract with immunising peptide competition
