# Supplementary material for: Progesterone Receptor Expression Declines in the Guinea Pig Uterus during Functional Progesterone Withdrawal and in Response to Prostaglandins
Source: PubMed Central journal article supplement (PMC4144885; doi:10.1371/journal.pone.0105253), 2014-08-26
Supplement: pone.0105253.s002.pdf [file pone.0105253.s002.pdf]

**Figure S2**  
**Immunoblot Detection of Estrogen Receptor (ESR1) Protein**  
**in Guinea Pig Uterus**

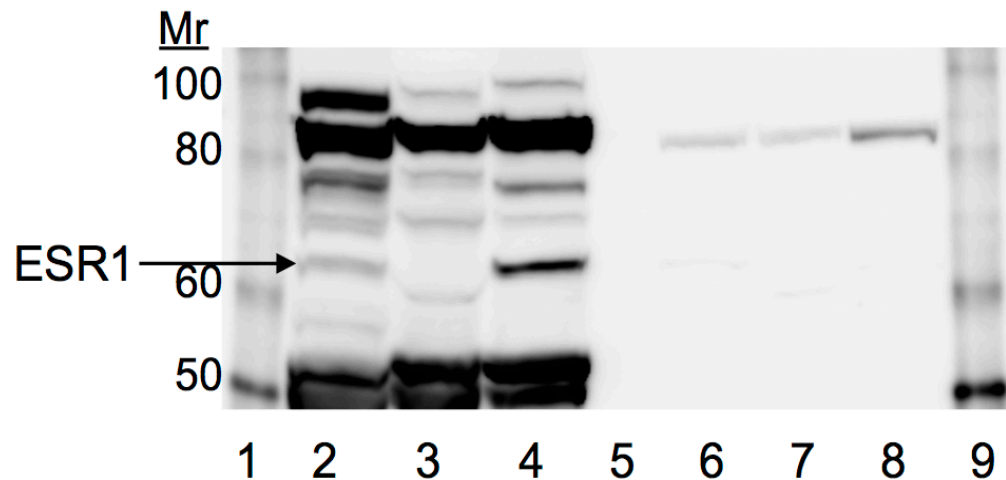

Lane Assignments:

1: Mr markers

2: Uterine tissue extract precipitated with ammonium sulphate

3: Uterine tissue extract

4: T47D cell extract (positive control)

5: Empty lane

6: Uterine tissue extract precipitated with ammonium sulphate and immunising peptide competition

7: Uterine tissue extract with immunising peptide competition

8: T47D cell extract with immunising peptide competition

9: Mr markers
