# Supplementary material for: Progesterone Receptor Expression Declines in the Guinea Pig Uterus during Functional Progesterone Withdrawal and in Response to Prostaglandins
Source: PubMed Central journal article supplement (PMC4144885; doi:10.1371/journal.pone.0105253), 2014-08-26

# Figure S3 A

## Uterine PRA and PRB Protein Levels During Pregnancy

(Key to lane assignments is in Table S1)

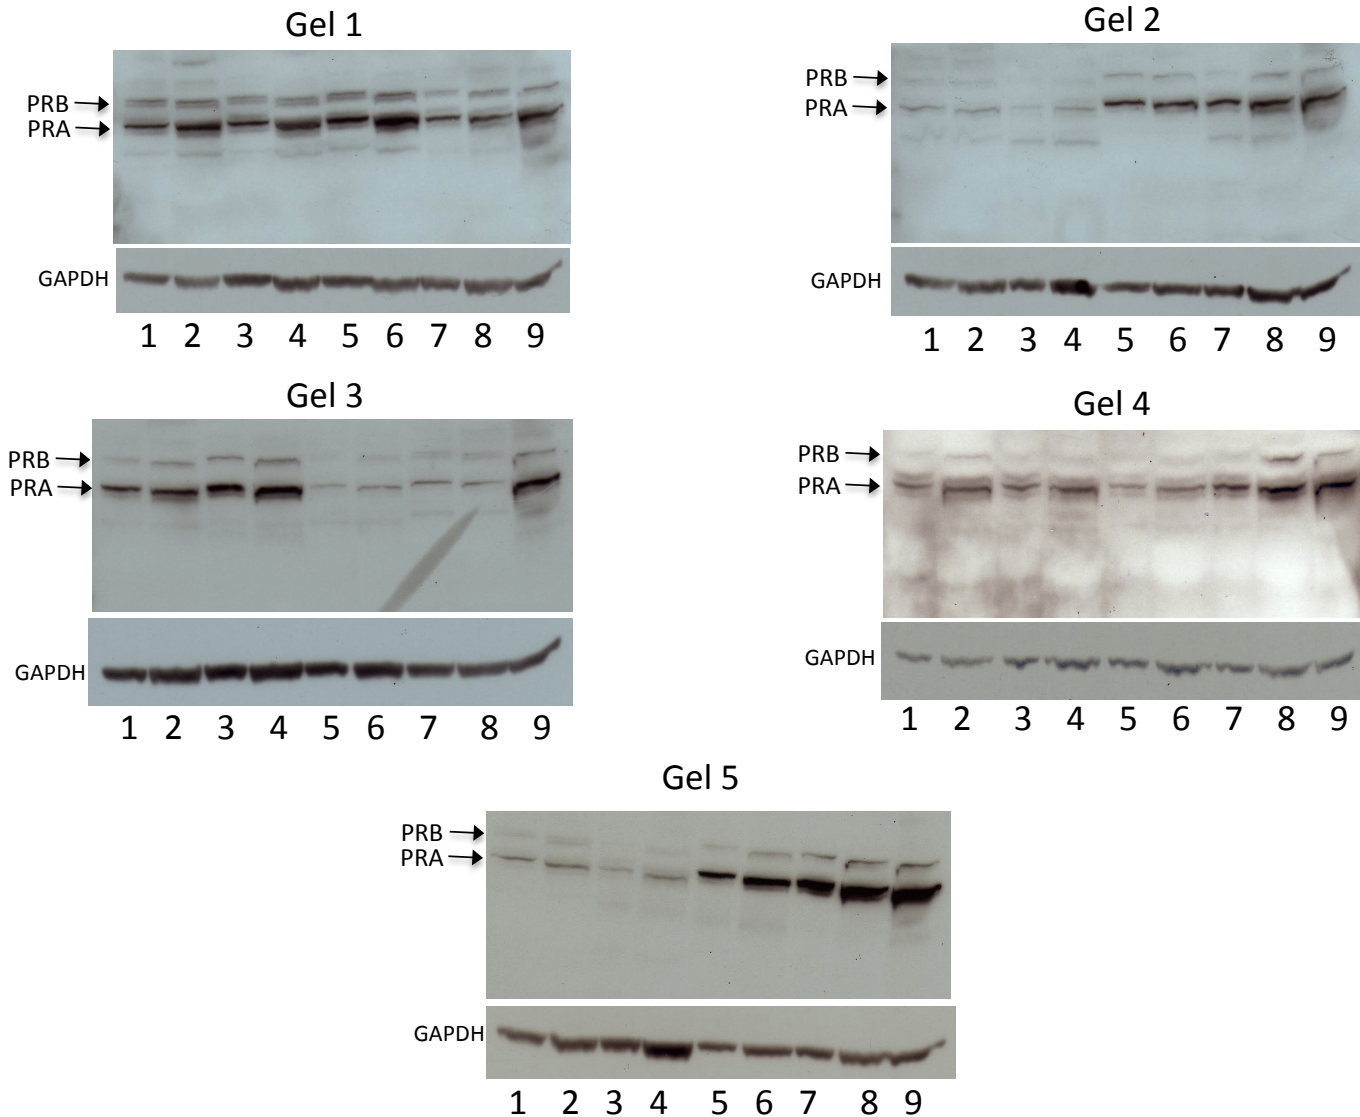

# Figure S3 B

## Uterine PRA and PRB Protein Levels During Pregnancy

(Key to lane assignments is in Table S1)

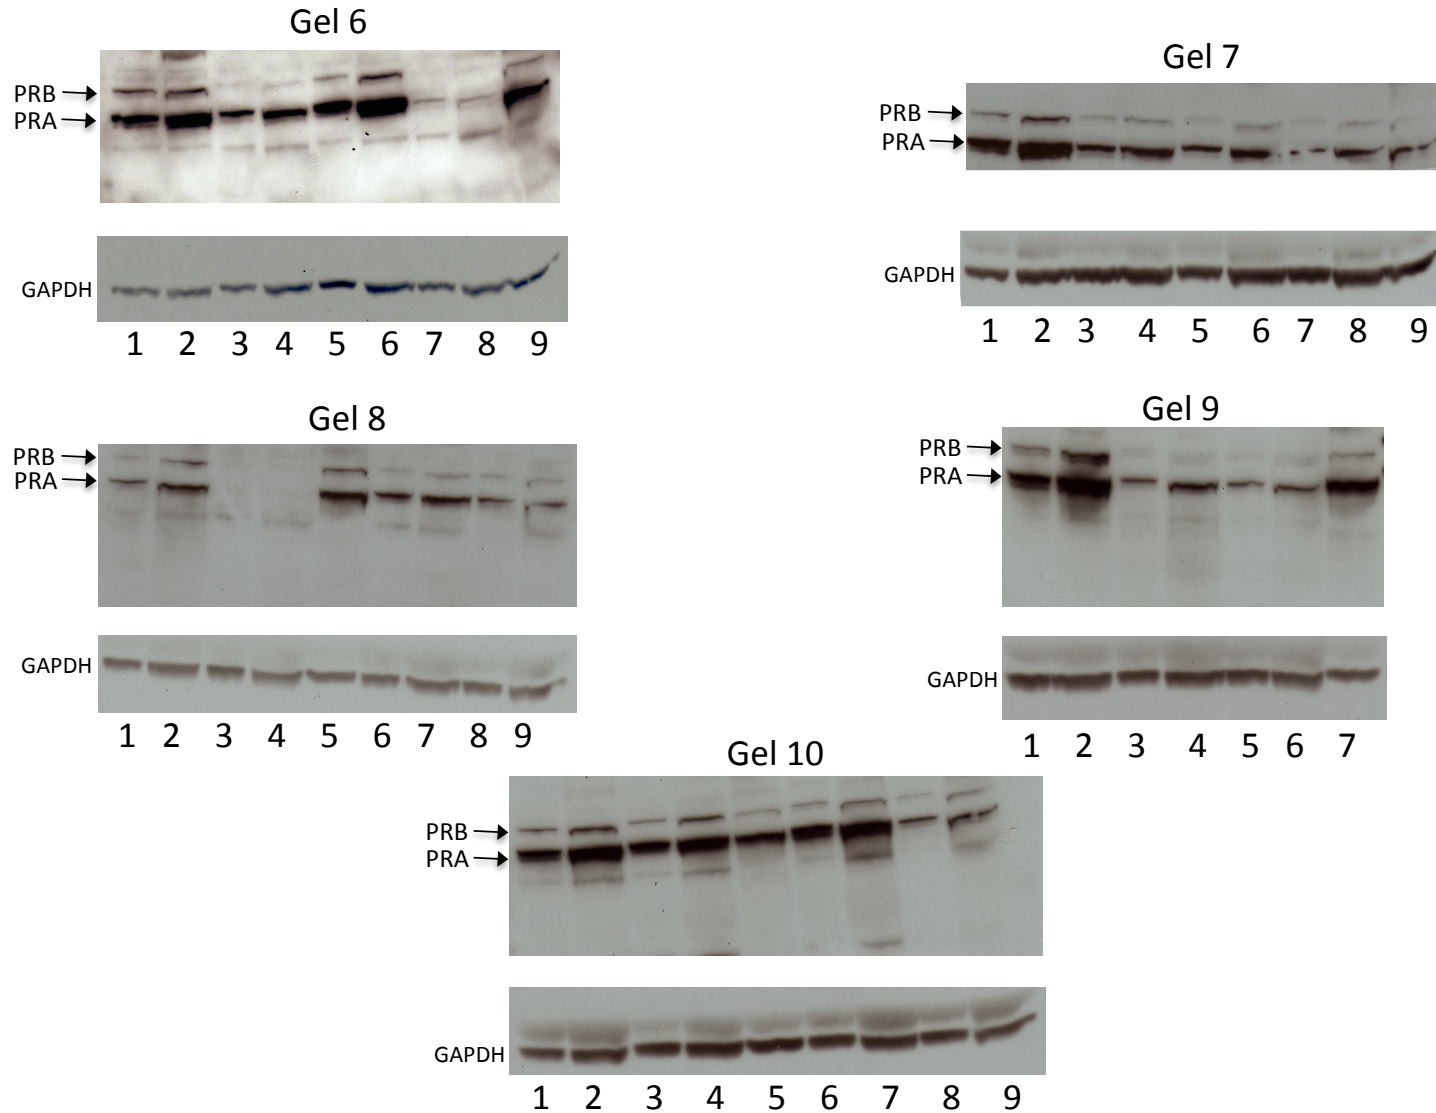

# Figure S3 C

## Uterine PRA and PRB Protein Levels During Pregnancy

(Key to lane assignments is in Table S1.)

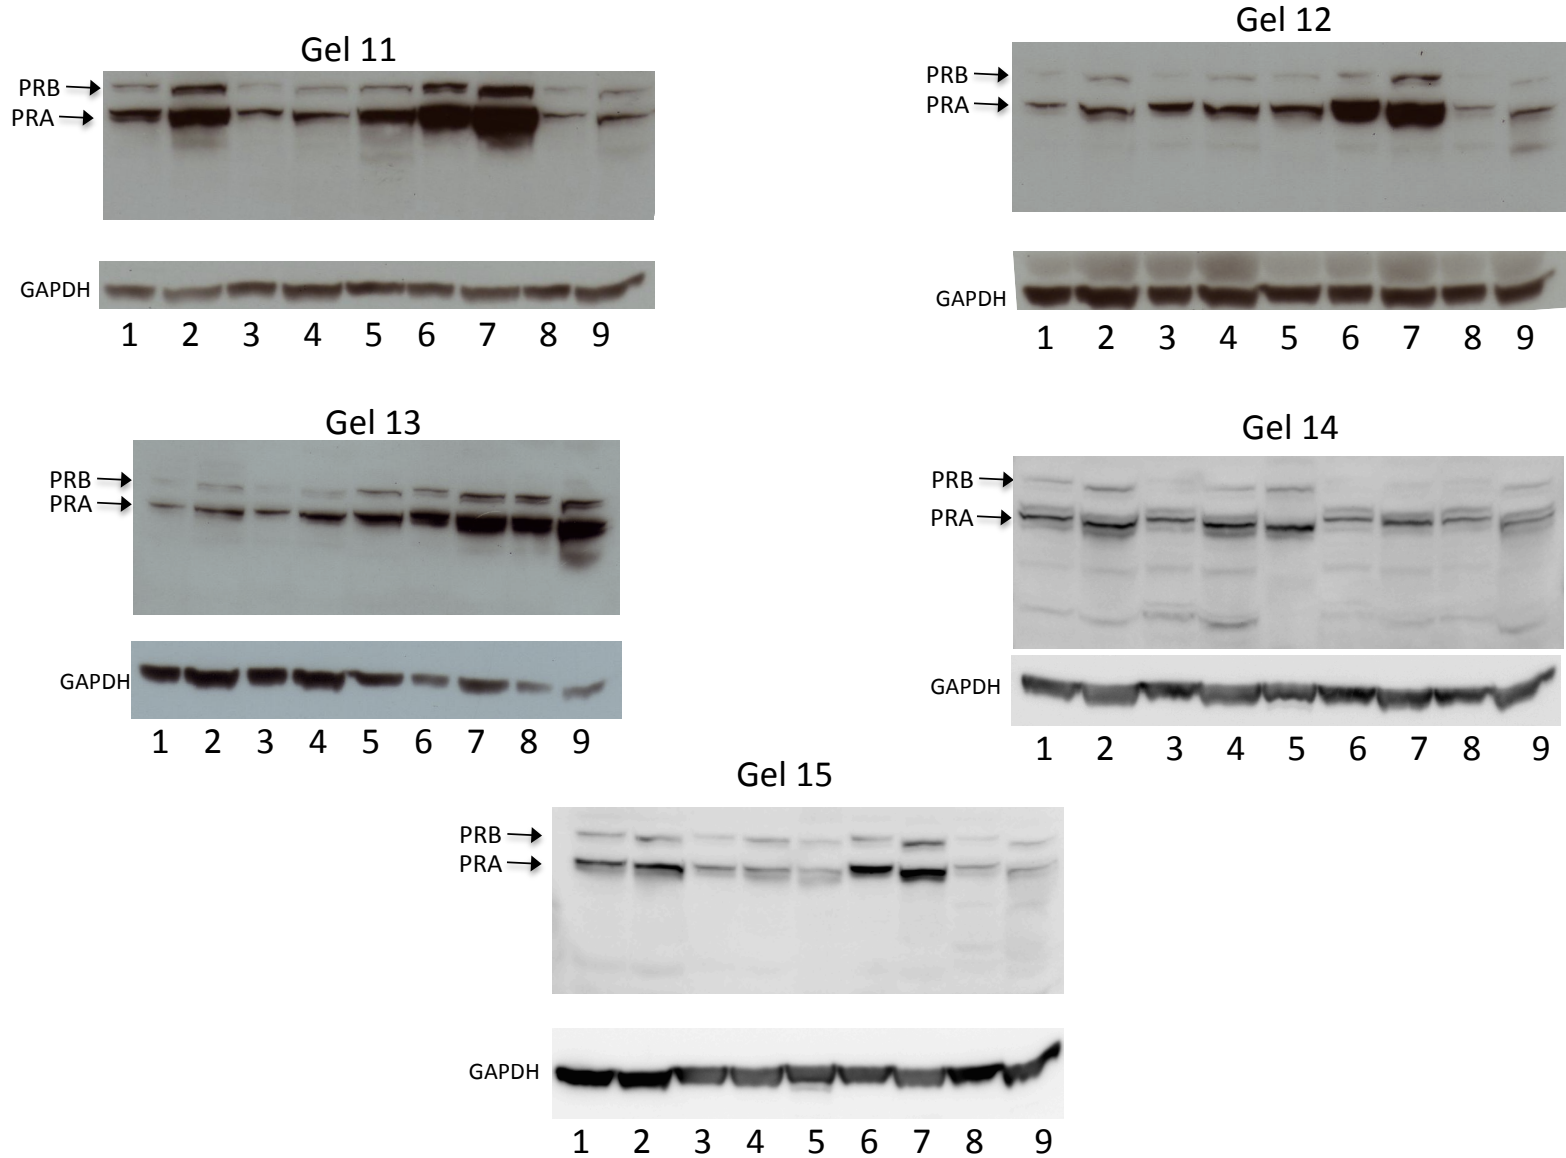

# Figure S3 D

## Uterine PRA and PRB Protein Levels During Pregnancy

(Key to lane assignments is in Table S1.)

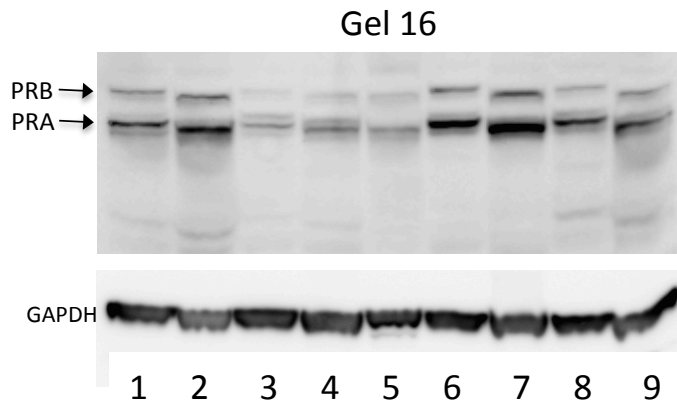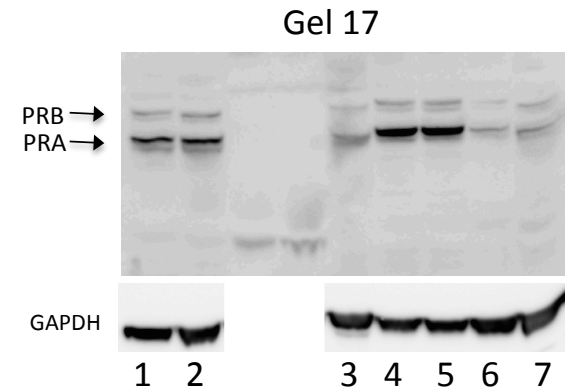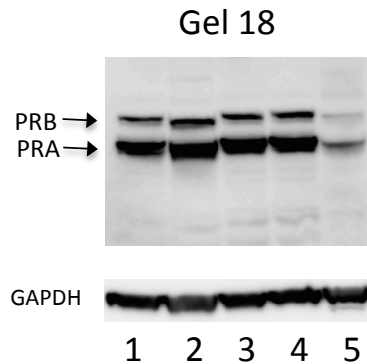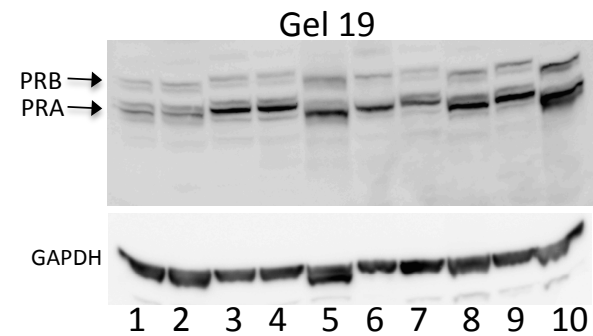

Supplement: pone.0105253.s003.pdf [file pone.0105253.s003.pdf]
