# Supplementary material for: Progesterone Receptor Expression Declines in the Guinea Pig Uterus during Functional Progesterone Withdrawal and in Response to Prostaglandins
Source: PubMed Central journal article supplement (PMC4144885; doi:10.1371/journal.pone.0105253), 2014-08-26

**Figure S4 A: Uterine ESR1 Protein Levels During Pregnancy**  
(Lane assignments are described in Table S2.)

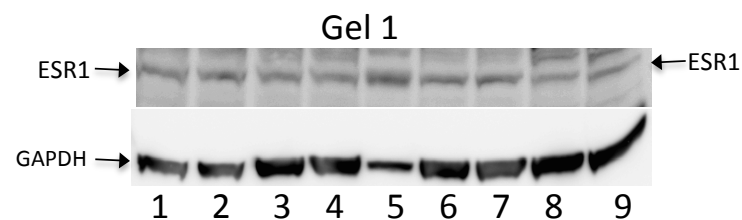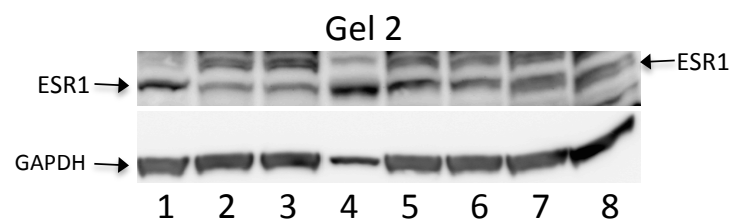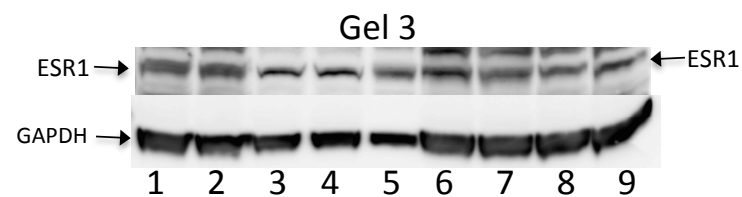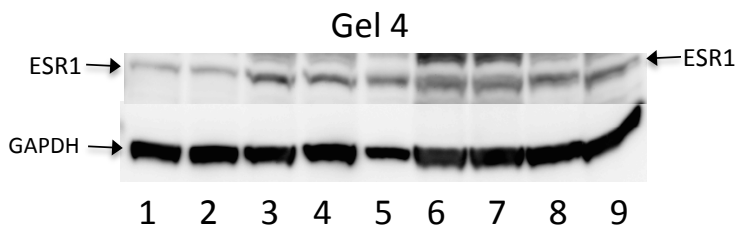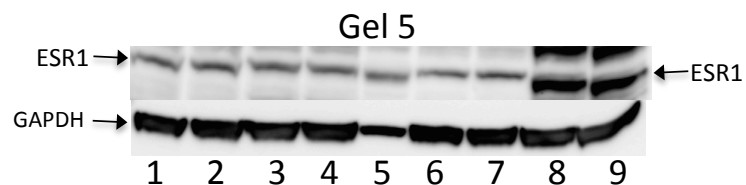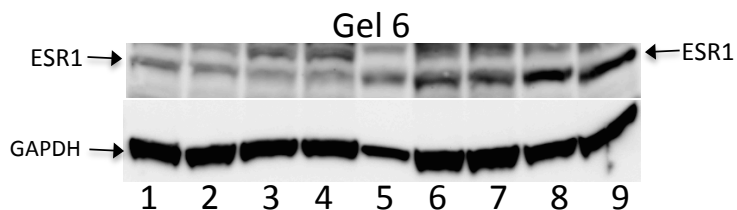

# Figure S4 B: Uterine ESR1 Protein Levels During Pregnancy

(Lane assignments are described in Table S2 .)

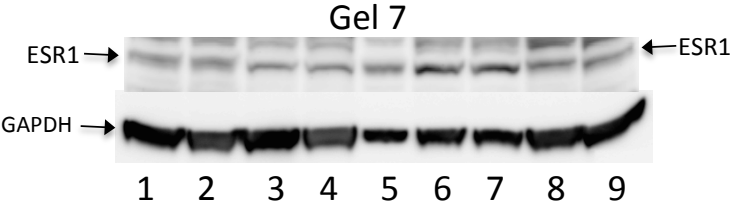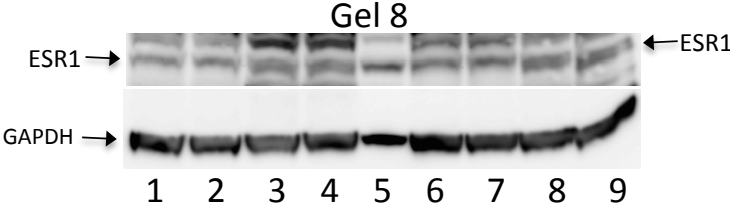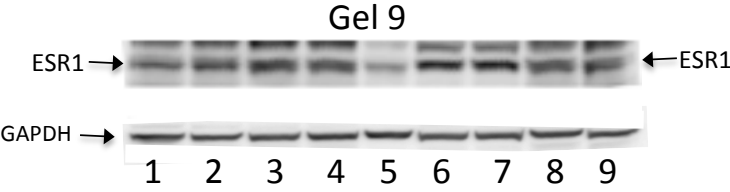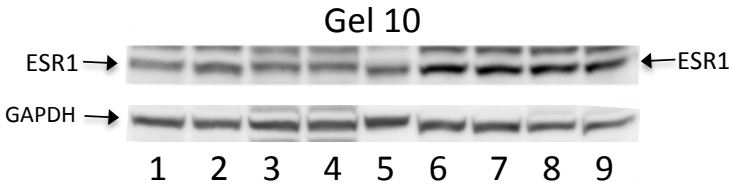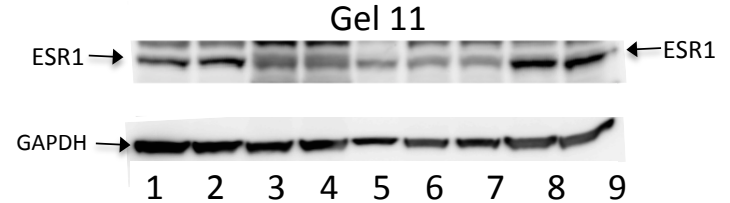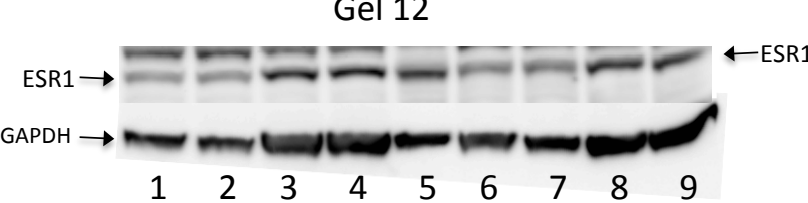

# Figure S4 C: Uterine ESR1 Protein Levels During Pregnancy

(Lane assignments are described in Table S2.)

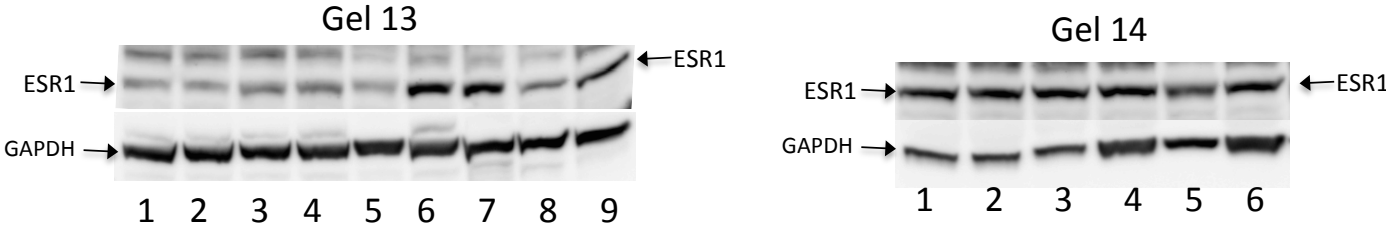

Supplement: pone.0105253.s004.pdf [file pone.0105253.s004.pdf]
