# Supplementary material for: Progesterone Receptor Expression Declines in the Guinea Pig Uterus during Functional Progesterone Withdrawal and in Response to Prostaglandins
Source: PubMed Central journal article supplement (PMC4144885; doi:10.1371/journal.pone.0105253), 2014-08-26

**Figure S5: Effect of Sulprostone on Uterine PRA and PRB Protein Levels**  
(Lane assignments are described in Table S3.)

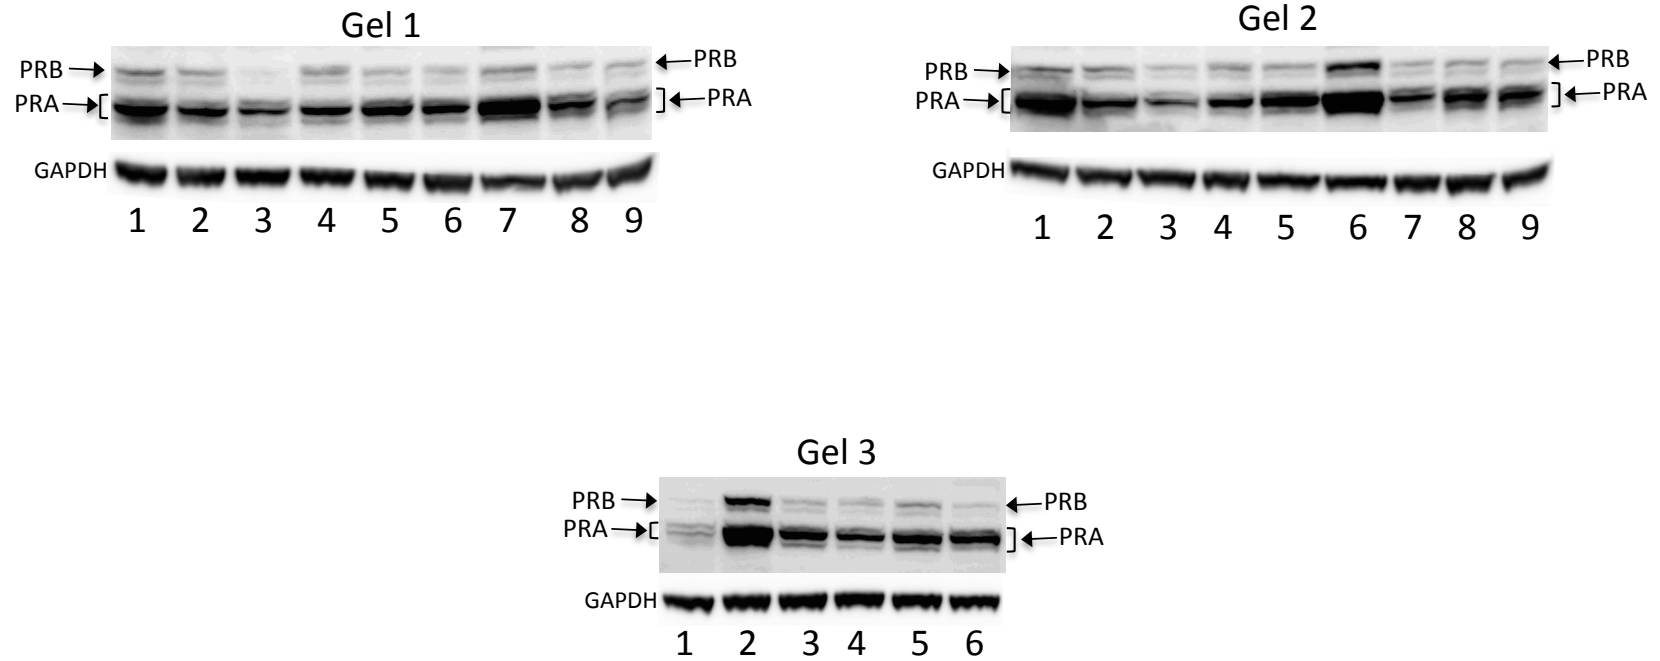

Supplement: pone.0105253.s005.pdf [file pone.0105253.s005.pdf]
