# Supplementary material for: Progesterone Receptor Expression Declines in the Guinea Pig Uterus during Functional Progesterone Withdrawal and in Response to Prostaglandins
Source: PubMed Central journal article supplement (PMC4144885; doi:10.1371/journal.pone.0105253), 2014-08-26
Supplement: pone.0105253.s008.pdf [file pone.0105253.s008.pdf]

**Table S1**

**Guinea Pig Uterine Progesterone Receptor Protein (PRA and PRB) Levels During Pregnancy**  
(Arbitrary Densitometric Units)

| Gel 1 |                               |           |          |           |           |            |              |            |              |
|-------|-------------------------------|-----------|----------|-----------|-----------|------------|--------------|------------|--------------|
| Lane  | Sample ID and protein loading | PR-A      | PR-B     | PR-A/PR-B | GAPDH     | PR-A/GAPDH | Rel to CAHm* | PR-B/GAPDH | Rel to CAHm* |
| 1     | 31m 50 ug                     | 151322.00 | 57490.73 | 2.6321    | 227932.38 | 0.6639     | 0.9685       | 0.2522     | 2.3672       |
| 2     | 31m 100 ug                    | 222679.79 | 65436.37 | 3.4030    | 250779.74 | 0.8879     | 1.2953       | 0.2609     | 2.4469       |
| 3     | 15m 50 ug                     | 176329.10 | 51916.62 | 3.4566    | 308205.8  | 0.5721     | 0.8348       | 0.1855     | 1.5534       |
| 4     | 15m 100 ug                    | 233983.96 | 56144.75 | 4.1675    | 334719.48 | 0.6890     | 1.0198       | 0.1677     | 1.5742       |
| 5     | 7m 50 ug                      | 203513.88 | 65071.95 | 3.1275    | 289208.04 | 0.7037     | 1.0265       | 0.2250     | 2.1117       |
| 6     | 7m 100 ug                     | 306578.34 | 80859.36 | 3.7915    | 323239.71 | 0.9485     | 1.3836       | 0.2502     | 2.3477       |
| 7     | 18m 49 ug                     | 98976.08  | 17815.50 | 5.5556    | 246929.86 | 0.4008     | 0.5847       | 0.0721     | 0.6771       |
| 8     | 18m 98 ug                     | 148617.89 | 29101.77 | 5.1068    | 314426.99 | 0.4727     | 0.6895       | 0.0926     | 0.8686       |
| 9     | CAHm 100 ug                   | 187758.31 | 29184.23 | 6.4336    | 273898.51 | 0.6855     | 1.0000       | 0.1066     | 1.0000       |

  

| Gel 2 |                               |           |          |           |           |            |              |            |              |
|-------|-------------------------------|-----------|----------|-----------|-----------|------------|--------------|------------|--------------|
| Lane  | Sample ID and protein loading | PR-A      | PR-B     | PR-A/PR-B | GAPDH     | PR-A/GAPDH | Rel to CAHm* | PR-B/GAPDH | Rel to CAHm* |
| 1     | 19m 50 ug                     | 54310.35  | 25791.61 | 2.1057    | 293383.56 | 0.1851     | 0.2112       | 0.0879     | 0.5399       |
| 2     | 19m 100 ug                    | 66080.61  | 18894.82 | 3.4973    | 329397.00 | 0.2006     | 0.2289       | 0.0574     | 0.3523       |
| 3     | L1m 43.4 ug                   | 24844.34  | 6236.73  | 3.9836    | 225669.52 | 0.1101     | 0.1256       | 0.0276     | 0.1697       |
| 4     | L1m 86.8 ug                   | 62514.83  | 13160.48 | 4.7502    | 388775.56 | 0.1608     | 0.1835       | 0.0339     | 0.2079       |
| 5     | CAHm 50 ug                    | 167522.73 | 42286.57 | 3.9616    | 256163.17 | 0.6540     | 0.7462       | 0.1651     | 1.0138       |
| 6     | CAHm 100 ug                   | 212758.2  | 44826.98 | 4.7462    | 309319.92 | 0.6878     | 0.7848       | 0.1449     | 0.8900       |
| 7     | 35m 50 ug                     | 192362.87 | 20262.07 | 9.4937    | 268670.00 | 0.7160     | 0.8169       | 0.0754     | 0.4632       |
| 8     | 35m 100 ug                    | 275702.54 | 56135.28 | 4.9114    | 361060.77 | 0.7636     | 0.8713       | 0.1555     | 0.9548       |
| 9     | CAHm 100 ug                   | 258827.6  | 48088.01 | 5.3824    | 295326.86 | 0.8764     | 1.0000       | 0.1628     | 1.0000       |

  

| Gel 3 |                               |           |          |           |           |            |              |            |              |
|-------|-------------------------------|-----------|----------|-----------|-----------|------------|--------------|------------|--------------|
| Lane  | Sample ID and protein loading | PR-A      | PR-B     | PR-A/PR-B | GAPDH     | PR-A/GAPDH | Rel to CAHm* | PR-B/GAPDH | Rel to CAHm* |
| 1     | 13m 50 ug                     | 138588.13 | 17531.32 | 7.9052    | 202371.14 | 0.6848     | 0.5485       | 0.0866     | 0.3290       |
| 2     | 13m 100 ug                    | 243636.24 | 47939.12 | 5.0822    | 303254.00 | 0.8034     | 0.6435       | 0.1581     | 0.6003       |
| 3     | 20m 50 ug                     | 181888.71 | 40031.82 | 4.5436    | 260081.50 | 0.6994     | 0.5601       | 0.1539     | 0.5845       |
| 4     | 20m 100 ug                    | 288440.15 | 76463.53 | 3.7723    | 368654.94 | 0.7824     | 0.6267       | 0.2074     | 0.7876       |
| 5     | 14m 37.3 ug                   | 36192.51  | 9165.84  | 3.9486    | 224500.54 | 0.1612     | 0.1291       | 0.0408     | 0.1550       |
| 6     | 14m 74.5 ug                   | 58731.01  | 18743.23 | 3.1335    | 291120.68 | 0.2017     | 0.1616       | 0.0644     | 0.2445       |
| 7     | L3m 50 ug                     | 53401.07  | 22497.89 | 2.3736    | 192482.12 | 0.2774     | 0.2222       | 0.1169     | 0.4438       |
| 8     | L3m 75 ug                     | 46489.38  | 27357.42 | 1.6983    | 189575.87 | 0.2452     | 0.1964       | 0.1443     | 0.5480       |
| 9     | CAHm 100 ug                   | 241379.31 | 50913.2  | 4.7410    | 193330.00 | 1.2485     | 1.0000       | 0.2833     | 1.0000       |

  

| Gel 4 |                               |           |          |           |          |            |              |            |              |
|-------|-------------------------------|-----------|----------|-----------|----------|------------|--------------|------------|--------------|
| Lane  | Sample ID and protein loading | PR-A      | PR-B     | PR-A/PR-B | GAPDH    | PR-A/GAPDH | Rel to CAHm* | PR-B/GAPDH | Rel to CAHm* |
| 1     | 38m 50 ug                     | 76204.00  | 4404.00  | 17.3034   | 20869.88 | 3.6514     | 0.4885       | 0.2110     | 0.1717       |
| 2     | 38m 100 ug                    | 188288.77 | 12322.08 | 8.8681    | 32317.21 | 5.8263     | 0.7795       | 0.6570     | 0.5346       |
| 3     | 75m 50 ug                     | 94788.00  | 7126.25  | 13.3013   | 31797.84 | 2.9810     | 0.3988       | 0.2241     | 0.1824       |
| 4     | 75m 100 ug                    | 135326.42 | 8378.70  | 16.1512   | 55609.64 | 2.4335     | 0.3256       | 0.1507     | 0.1226       |
| 5     | 17m 50 ug                     | 69667.85  | 8255.18  | 8.3666    | 33890.90 | 2.0379     | 0.2727       | 0.2436     | 0.1982       |
| 6     | 17m 100 ug                    | 114489.50 | 14000.75 | 8.1781    | 53352.33 | 2.1461     | 0.2871       | 0.2624     | 0.2136       |
| 7     | 66m 50 ug                     | 138194.42 | 11283.56 | 12.2474   | 28429.43 | 4.8610     | 0.6503       | 0.3969     | 0.3230       |
| 8     | 66m 100 ug                    | 256576.50 | 58646.54 | 4.3750    | 46401.87 | 5.5294     | 0.7398       | 1.2639     | 1.0285       |
| 9     | CAHm 100 ug                   | 275512.31 | 45295.09 | 6.0826    | 36860.00 | 7.4746     | 1.0000       | 1.2288     | 1.0000       |

  

| Gel 5 |                               |           |          |           |           |            |              |            |              |
|-------|-------------------------------|-----------|----------|-----------|-----------|------------|--------------|------------|--------------|
| Lane  | Sample ID and protein loading | PR-A      | PR-B     | PR-A/PR-B | GAPDH     | PR-A/GAPDH | Rel to CAHm* | PR-B/GAPDH | Rel to CAHm* |
| 1     | 25m 50 ug                     | 42020.17  | 11239.62 | 3.7386    | 343375.94 | 0.1224     | 0.1141       | 0.0327     | 0.1890       |
| 2     | 25m 100 ug                    | 62599.38  | 20608.48 | 3.0376    | 412278.71 | 0.1518     | 0.1415       | 0.0500     | 0.2887       |
| 3     | L4m 50 ug                     | 22535.22  | 2023.02  | 11.1394   | 351494.76 | 0.0654     | 0.0598       | 0.0184     | 0.0332       |
| 4     | L4m 100 ug                    | 58572.25  | 9978.13  | 5.8701    | 540909.57 | 0.1083     | 0.1009       | 0.0184     | 0.1065       |
| 5     | 51m 50 ug                     | 132610.95 | 10170.44 | 13.0389   | 227403.27 | 0.5832     | 0.5436       | 0.0447     | 0.2583       |
| 6     | 51m 100 ug                    | 242187.65 | 28964.50 | 8.3615    | 331062.09 | 0.7315     | 0.6820       | 0.0875     | 0.5053       |
| 7     | 94m 50 ug                     | 256353.01 | 34463.55 | 7.4384    | 261105.65 | 0.9818     | 0.9152       | 0.1320     | 0.7623       |
| 8     | 94m 100 ug                    | 368688.70 | 66980.15 | 5.5044    | 359695.94 | 1.0250     | 0.9555       | 0.1862     | 1.0754       |
| 9     | CAHm 100 ug                   | 394653.54 | 63703.15 | 6.1952    | 367897.58 | 1.0727     | 1.0000       | 0.1732     | 1.0000       |

  

| Gel 6 |                               |           |           |           |          |            |              |            |              |
|-------|-------------------------------|-----------|-----------|-----------|----------|------------|--------------|------------|--------------|
| Lane  | Sample ID and protein loading | PR-A      | PR-B      | PR-A/PR-B | GAPDH    | PR-A/GAPDH | Rel to CAHm* | PR-B/GAPDH | Rel to CAHm* |
| 1     | 37m 50 ug                     | 253369.38 | 91916.32  | 2.7630    | 43167.40 | 5.8834     | 1.5101       | 2.1235     | 6.1523       |
| 2     | 37m 100 ug                    | 320897.69 | 106878.71 | 3.0033    | 50619.39 | 6.3412     | 1.6276       | 2.1114     | 6.1007       |
| 3     | 58m 50 ug                     | 140486.92 | 9540.35   | 14.7256   | 36619.75 | 3.8364     | 0.9847       | 0.2605     | 0.7528       |
| 4     | 58m 100 ug                    | 217332.65 | 14315.00  | 15.1822   | 70900.28 | 3.0653     | 0.7868       | 0.2019     | 0.5834       |
| 5     | 26m 50 ug                     | 249904.08 | 40220.07  | 6.2134    | 66027.41 | 3.7849     | 0.9715       | 0.6091     | 1.7600       |
| 6     | 26m 100 ug                    | 397735.35 | 106909.62 | 3.7203    | 86799.57 | 4.5822     | 1.1761       | 1.2317     | 3.5588       |
| 7     | L5m 50 ug                     | 39118.60  | 4768.03   | 8.2044    | 46015.51 | 0.8501     | 0.2182       | 0.1036     | 0.2994       |
| 8     | L5m 100 ug                    | 44951.40  | 8976.53   | 5.0077    | 66029.26 | 0.6808     | 0.1747       | 0.1359     | 0.3928       |
| 9     | CAHm 100 ug                   | 217496.57 | 19320.90  | 11.2571   | 55825.14 | 3.8960     | 1.0000       | 0.3461     | 1.0000       |

  

| Gel 7 |                               |           |           |           |           |            |              |            |              |
|-------|-------------------------------|-----------|-----------|-----------|-----------|------------|--------------|------------|--------------|
| Lane  | Sample ID and protein loading | PR-A      | PR-B      | PR-A/PR-B | GAPDH     | PR-A/GAPDH | Rel to CAHm* | PR-B/GAPDH | Rel to CAHm* |
| 1     | 74m 50 ug                     | 253960.54 | 37901.46  | 6.7005    | 137862.20 | 1.8421     | 3.2333       | 0.2749     | 5.4187       |
| 2     | 74m 100 ug                    | 387594.49 | 100329.79 | 3.8632    | 249215.07 | 1.5553     | 2.7298       | 0.4026     | 7.9349       |
| 3     | 95m 50 ug                     | 147751.94 | 16543.21  | 8.9313    | 248128.20 | 0.5955     | 1.0452       | 0.0667     | 1.3141       |
| 4     | 95m 100 ug                    | 227127.57 | 31171.39  | 7.2864    | 267501.75 | 0.8491     | 1.4903       | 0.1165     | 2.2967       |
| 5     | 52m 50 ug                     | 117031.11 | 7710.97   | 15.1772   | 182281.20 | 0.6420     | 1.1269       | 0.0423     | 0.8338       |
| 6     | 52m 100 ug                    | 192125.77 | 35484.34  | 5.4144    | 292258.00 | 0.6574     | 1.1538       | 0.1214     | 2.3931       |
| 7     | 84m 50 ug                     | 43836.63  | 6676.00   | 6.5663    | 235064.22 | 0.1865     | 0.3273       | 0.0284     | 0.5598       |
| 8     | 84m 100 ug                    | 152805.46 | 18050.53  | 8.4654    | 294426.06 | 0.5190     | 0.9109       | 0.0613     | 1.2084       |
| 9     | CAHm 100 ug                   | 126674.32 | 11280.55  | 11.2294   | 222338.13 | 0.5697     | 1.0000       | 0.0507     | 1.0000       |

  

| Gel 8 |                               |           |          |           |           |            |              |            |              |
|-------|-------------------------------|-----------|----------|-----------|-----------|------------|--------------|------------|--------------|
| Lane  | Sample ID and protein loading | PR-A      | PR-B     | PR-A/PR-B | GAPDH     | PR-A/GAPDH | Rel to CAHm* | PR-B/GAPDH | Rel to CAHm* |
| 1     | 30m 50 ug                     | 54861.77  | 8862.37  | 6.1904    | 71968.39  | 0.7623     | 0.3505       | 0.1231     | 0.2253       |
| 2     | 30m 100 ug                    | 142899.95 | 42049.75 | 3.3984    | 116428.71 | 1.2274     | 0.5643       | 0.3612     | 0.6608       |
| 3     | L6m 50 ug                     | 3112.00   | 2573.03  | 1.2095    | 85032.33  | 0.0366     | 0.0168       | 0.0303     | 0.0554       |
| 4     | L6m 100 ug                    | 8221.11   | 3271.00  | 2.5133    | 91125.20  | 0.0902     | 0.0415       | 0.0359     | 0.0657       |
| 5     | CAHm 100 ug                   | 202159.65 | 50799.13 | 3.9796    | 92949.07  | 2.1750     | 1.0000       | 0.5465     | 1.0000       |
| 6     | 100m 50 ug                    | 192149.00 | 14474.63 | 7.0570    | 73065.18  | 1.3692     | 0.6432       | 0.1993     | 0.3628       |
| 7     | 100m 100 ug                   | 153542.58 | 20779.95 | 7.3890    | 104352.83 | 1.4714     | 0.6765       | 0.1991     | 0.3644       |
| 8     | 81m 50 ug                     | 64467.75  | 11385.00 | 5.6625    | 87735.74  | 0.7348     | 0.3378       | 0.1298     | 0.2374       |
| 9     | 81m 100 ug                    | 60012.49  | 13278.38 | 4.5196    | 89770.13  | 0.6685     | 0.3074       | 0.1479     | 0.2706       |

  

| Gel 9 |                               |           |           |           |           |            |              |            |              |
|-------|-------------------------------|-----------|-----------|-----------|-----------|------------|--------------|------------|--------------|
| Lane  | Sample ID and protein loading | PR-A      | PR-B      | PR-A/PR-B | GAPDH     | PR-A/GAPDH | Rel to CAHm* | PR-B/GAPDH | Rel to CAHm* |
| 1     | 86m 50 ug                     | 250818.20 | 64555.43  | 3.8793    | 160419.60 | 1.5635     | 0.6672       | 0.4030     | 1.3221       |
| 2     | 86m 100 ug                    | 457996.31 | 191781.71 | 2.3881    | 233397.02 | 1.9623     | 0.8374       | 0.8217     | 2.6954       |
| 3     | 29m 50 ug                     | 75033.54  | 12935.79  | 5.8005    | 134879.72 | 0.5563     | 0.2374       | 0.0959     | 0.3146       |
| 4     | 29m 100 ug                    | 163631.54 | 17152.18  | 9.5400    | 236593.67 | 0.6858     | 0.2927       | 0.0719     | 0.2358       |
| 5     | L7m 50 ug                     | 64108.77  | 8739.76   | 7.3351    | 149058.77 | 0.4301     | 0.2335       | 0.0586     | 0.1923       |
| 6     | L7m 100 ug                    | 121605.16 | 22737.58  | 5.3482    | 176209.06 | 0.6901     | 0.2945       | 0.1290     | 0.4233       |
| 7     | CAHm 100 ug                   | 303345.40 | 39463.25  | 7.6868    | 129452.07 | 2.3433     | 1.0000       | 0.3048     | 1.0000       |

  

| Gel 10 |                               |           |           |           |           |            |              |            |              |
|--------|-------------------------------|-----------|-----------|-----------|-----------|------------|--------------|------------|--------------|
| Lane   | Sample ID and protein loading | PR-A      | PR-B      | PR-A/PR-B | GAPDH     | PR-A/GAPDH | Rel to CAHm* | PR-B/GAPDH | Rel to CAHm* |
| 1      | 191m 50 ug                    | 221813.15 | 49696.67  | 4.4633    | 117161.23 | 1.8932     | 1.7729       | 0.4242     | 3.6556       |
| 2      | 191m 100 ug                   | 396789.78 | 110353.46 | 3.5956    | 208589.69 | 1.9023     | 1.7813       | 0.5290     | 4.5594       |
| 3      | 192m 50 ug                    | 210004.19 | 32216.93  | 6.5184    | 159465.75 | 1.3169     | 1.2332       | 0.2020     | 1.7411       |

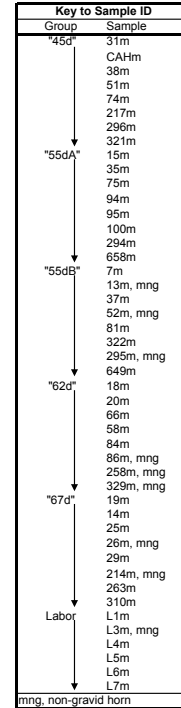

|   |             |           |          |        |           |        |        |        |        |
|---|-------------|-----------|----------|--------|-----------|--------|--------|--------|--------|
| 4 | 192m 100 ug | 335412.25 | 83112.42 | 4.0356 | 260547.85 | 1.2873 | 1.2055 | 0.3190 | 2.7491 |
| 5 | CAHm 100 ug | 240139.27 | 26092.83 | 9.2033 | 224872.46 | 1.0679 | 1.0000 | 0.1160 | 1.0000 |
| 6 | 194m 50 ug  | 256028.49 | 29866.94 | 8.5723 | 171030.61 | 1.4970 | 1.4018 | 0.1746 | 1.5050 |
| 7 | 194m 100 ug | 362353.60 | 60927.82 | 6.2755 | 224663.99 | 1.7019 | 1.5937 | 0.2712 | 2.3372 |
| 8 | 241m 50 ug  | 89471.29  | 16115.46 | 5.5509 | 161585.53 | 0.5537 | 0.5185 | 0.0597 | 0.8597 |
| 9 | 241m 100 ug | 104735.46 | 20840.24 | 5.0256 | 165306.06 | 0.6336 | 0.5933 | 0.1261 | 1.0865 |

| Gel 11 |                               |           |           |           |           |            |              |            |              |
|--------|-------------------------------|-----------|-----------|-----------|-----------|------------|--------------|------------|--------------|
| Lane   | Sample ID and protein loading | PR-A      | PR-B      | PR-A/PR-B | GAPDH     | PR-A/GAPDH | Rel to CAHm* | PR-B/GAPDH | Rel to CAHm* |
| 1      | 156m 50 ug                    | 178551.17 | 34369.89  | 5.1950    | 102853.00 | 1.7360     | 0.9909       | 0.3342     | 1.1202       |
| 2      | 156m 100 ug                   | 349645.82 | 13931.87  | 2.6165    | 103737.35 | 3.3705     | 1.9239       | 1.2832     | 4.3184       |
| 3      | 224m 50 ug                    | 95048.25  | 13153.91  | 7.2259    | 131171.42 | 0.7246     | 0.4136       | 0.1003     | 0.3362       |
| 4      | 224m 100 ug                   | 145924.96 | 30710.94  | 4.7516    | 184701.54 | 0.7901     | 0.4510       | 0.1663     | 0.5574       |
| 5      | CAHm 100 ug                   | 287095.27 | 48884.65  | 5.8729    | 163877.05 | 1.7519     | 1.0000       | 0.2963     | 1.0000       |
| 6      | 230m 50 ug                    | 427781.44 | 116195.17 | 3.6818    | 120564.32 | 3.5482     | 2.0253       | 0.9638     | 3.2308       |
| 7      | 230m 100 ug                   | 618135.48 | 182423.11 | 3.3885    | 138752.97 | 4.4549     | 2.5429       | 1.3147     | 4.4074       |
| 8      | 233m 50 ug                    | 61809.94  | 16741.50  | 3.6920    | 133119.50 | 0.4643     | 0.2650       | 0.1258     | 0.4216       |
| 9      | 233m 100 ug                   | 94801.91  | 36995.93  | 2.5625    | 195311.79 | 0.4854     | 0.2771       | 0.1894     | 0.6350       |

| Gel 12 |                               |           |          |           |           |            |              |            |              |
|--------|-------------------------------|-----------|----------|-----------|-----------|------------|--------------|------------|--------------|
| Lane   | Sample ID and protein loading | PR-A      | PR-B     | PR-A/PR-B | GAPDH     | PR-A/GAPDH | Rel to CAHm* | PR-B/GAPDH | Rel to CAHm* |
| 1      | 197m 47.4 ug                  | 53414.68  | 7095.68  | 7.5278    | 239813.95 | 0.2227     | 0.3185       | 0.0296     | 0.7271       |
| 2      | 197m 94.8 ug                  | 140214.14 | 25713.70 | 5.4529    | 364991.15 | 0.3842     | 0.5494       | 0.0705     | 1.7312       |
| 3      | 225m 50 ug                    | 134024.77 | 6689.75  | 20.0343   | 203535.10 | 0.6585     | 0.9417       | 0.0329     | 0.8077       |
| 4      | 225m 100 ug                   | 189425.70 | 16910.72 | 11.2015   | 314560.14 | 0.6022     | 0.8612       | 0.0538     | 1.3211       |
| 5      | CAHm 100 ug                   | 186809.33 | 10872.00 | 17.1826   | 267167.07 | 0.6992     | 1.0000       | 0.0407     | 1.0000       |
| 6      | 232m 50 ug                    | 344278.71 | 22029.71 | 15.6279   | 201711.33 | 1.7068     | 2.4410       | 0.1092     | 2.6838       |
| 7      | 232m 100 ug                   | 438382.27 | 92977.22 | 4.7149    | 270826.80 | 1.6187     | 2.3150       | 0.3433     | 8.4364       |
| 8      | 219m 50 ug                    | 42305.09  | 2562.88  | 16.5069   | 193667.67 | 0.2184     | 0.3124       | 0.0132     | 0.3252       |
| 9      | 219m 100 ug                   | 81105.93  | 6002.18  | 13.5127   | 225307.14 | 0.3600     | 0.5148       | 0.0266     | 0.6546       |

| Gel 13 |                               |           |           |           |           |            |              |            |              |
|--------|-------------------------------|-----------|-----------|-----------|-----------|------------|--------------|------------|--------------|
| Lane   | Sample ID and protein loading | PR-A      | PR-B      | PR-A/PR-B | GAPDH     | PR-A/GAPDH | Rel to CAHm* | PR-B/GAPDH | Rel to CAHm* |
| 1      | 226m 50 ug                    | 49442.07  | 8186.10   | 6.0398    | 215244.40 | 0.2297     | 0.2088       | 0.0380     | 0.1417       |
| 2      | 226m 100 ug                   | 128161.33 | 21946.00  | 5.8666    | 359860.40 | 0.3571     | 0.3246       | 0.0609     | 0.2268       |
| 3      | 83m 50 ug                     | 79831.02  | 9155.21   | 8.7197    | 242903.94 | 0.3287     | 0.2987       | 0.0377     | 0.1404       |
| 4      | 83m 100 ug                    | 191863.47 | 25849.83  | 7.4222    | 336069.51 | 0.5709     | 0.5189       | 0.0769     | 0.2865       |
| 5      | CAHm 100 ug                   | 244003.66 | 59536.26  | 4.0984    | 221764.56 | 1.1003     | 1.0000       | 0.2655     | 1.0000       |
| 6      | 216m 50 ug                    | 246613.85 | 46645.23  | 5.2870    | 88293.62  | 2.7931     | 2.5385       | 0.5283     | 1.9678       |
| 7      | 216m 100 ug                   | 440709.11 | 116105.35 | 3.7958    | 183596.21 | 2.4004     | 2.1816       | 0.6324     | 2.3556       |
| 8      | 207m 50 ug                    | 333525.47 | 92006.04  | 3.6250    | 57411.90  | 5.8093     | 3.2799       | 1.6026     | 5.9693       |
| 9      | 207m 100 ug                   | 454904.44 | 148060.33 | 3.0724    | 76277.52  | 5.9638     | 5.4203       | 1.9411     | 7.2302       |

| Westerns Jan-Mar 2010 |                               |             |            |           |             |            |              |            |              |
|-----------------------|-------------------------------|-------------|------------|-----------|-------------|------------|--------------|------------|--------------|
| Gel 14                |                               |             |            |           |             |            |              |            |              |
| Lane                  | Sample ID and protein loading | PR-A        | PR-B       | PR-A/PR-B | GAPDH       | PR-A/GAPDH | Rel to CAHm* | PR-B/GAPDH | Rel to CAHm* |
| 1                     | 296m 50 ug                    | 10704802.63 | 1936635.13 | 5.5275    | 16373387.02 | 0.6538     | 0.7688       | 0.1183     | 0.6310       |
| 2                     | 296m 100 ug                   | 15398093.57 | 3023481.22 | 4.0272    | 16921627.54 | 0.9100     | 1.0701       | 0.2260     | 1.2055       |
| 3                     | 294m 50 ug                    | 7320485.71  | 96916.14   | 8.0718    | 17304311.76 | 0.4230     | 0.4975       | 0.0524     | 0.2796       |
| 4                     | 294m 100 ug                   | 13437534.85 | 1924539.18 | 6.9822    | 17013065.68 | 0.7900     | 0.9290       | 0.1131     | 0.6036       |
| 5                     | CAHm 100 ug                   | 13813479.53 | 3044767.65 | 4.5368    | 16244073.12 | 0.8504     | 1.0000       | 0.1874     | 1.0000       |
| 6                     | 322m 50 ug                    | 6320801.88  | 360923.55  | 17.5129   | 18141356.00 | 0.3484     | 0.4097       | 0.0199     | 0.1061       |
| 7                     | 322m 100 ug                   | 10660436.62 | 550068.17  | 19.3802   | 18370328.00 | 0.5803     | 0.6824       | 0.0299     | 0.1597       |
| 8                     | 258m 50 ug                    | 6713094.39  | 493652.69  | 13.5988   | 15721060.64 | 0.4270     | 0.5021       | 0.0314     | 0.1675       |
| 9                     | 258m 100 ug                   | 8797546.31  | 2100497.00 | 4.1883    | 15247173.51 | 0.5770     | 0.6785       | 0.1378     | 0.7350       |

| Gel 15 |                               |             |            |           |             |            |              |            |              |
|--------|-------------------------------|-------------|------------|-----------|-------------|------------|--------------|------------|--------------|
| Lane   | Sample ID and protein loading | PR-A        | PR-B       | PR-A/PR-B | GAPDH       | PR-A/GAPDH | Rel to CAHm* | PR-B/GAPDH | Rel to CAHm* |
| 1      | 258mng 50 ug                  | 6397442.42  | 1309432.14 | 4.8857    | 14620873.65 | 0.4376     | 1.5752       | 0.0896     | 1.5334       |
| 2      | 258mng 100 ug                 | 9441506.14  | 1983688.86 | 4.7596    | 13857604.56 | 0.6813     | 2.4527       | 0.1431     | 2.4510       |
| 3      | 295m 50 ug                    | 3266382.81  | 546385.50  | 5.9782    | 10492434.62 | 0.3113     | 1.1207       | 0.0521     | 0.8916       |
| 4      | 295m 100 ug                   | 3937589.22  | 1306971.07 | 3.0128    | 10561267.13 | 0.3728     | 1.3422       | 0.1238     | 2.1189       |
| 5      | CAHm 100 ug                   | 2812848.23  | 591407.03  | 4.7562    | 10126981.65 | 0.2778     | 1.0000       | 0.0584     | 1.0000       |
| 6      | 295mng 50 ug                  | 10308722.66 | 1187703.40 | 8.8282    | 995626.51   | 1.0353     | 3.7272       | 0.1173     | 2.0080       |
| 7      | 295mng 100 ug                 | 11797799.25 | 3082806.20 | 3.8270    | 10114159.07 | 1.1665     | 4.1992       | 0.3048     | 5.2188       |
| 8      | 329m 50 ug                    | 2341701.83  | 324555.75  | 7.2151    | 12554893.80 | 0.1865     | 0.6714       | 0.0259     | 0.4426       |
| 9      | 329m 100 ug                   | 6246600.50  | 577700.23  | 2.9650    | 12874800.40 | 0.1745     | 0.6282       | 0.0589     | 1.0077       |

| Gel 16 |                               |             |            |           |             |            |              |            |              |
|--------|-------------------------------|-------------|------------|-----------|-------------|------------|--------------|------------|--------------|
| Lane   | Sample ID and protein loading | PR-A        | PR-B       | PR-A/PR-B | GAPDH       | PR-A/GAPDH | Rel to CAHm* | PR-B/GAPDH | Rel to CAHm* |
| 1      | 329mng 50 ug                  | 6007280.09  | 1821781.00 | 3.2975    | 12006780.00 | 0.5003     | 1.4674       | 0.1517     | 1.5990       |
| 2      | 329mng 100 ug                 | 8542882.79  | 2737447.50 | 3.1207    | 8911795.37  | 0.9586     | 2.8114       | 0.3072     | 3.2372       |
| 3      | 263m 50 ug                    | 3233682.53  | 402302.63  | 7.6934    | 12343643.72 | 0.2620     | 0.7683       | 0.0341     | 0.3589       |
| 4      | 263m 100 ug                   | 5194000.99  | 823814.43  | 6.3049    | 1235308.00  | 0.4205     | 1.2391       | 0.0667     | 0.7028       |
| 5      | CAHm 100 ug                   | 3312499.41  | 921827.44  | 3.5934    | 9714972.00  | 0.3410     | 1.0000       | 0.0949     | 1.0000       |
| 6      | L3mng 50 ug                   | 10104343.91 | 2401434.60 | 4.2076    | 11985429.28 | 0.8431     | 2.4725       | 0.2004     | 2.1116       |
| 7      | L3mng 100 ug                  | 14564360.35 | 3448355.88 | 4.2236    | 11596511.03 | 1.2559     | 3.6834       | 0.2974     | 3.1338       |
| 8      | 321m 50 ug                    | 7224489.25  | 1201393.14 | 6.0134    | 11557557.64 | 0.6251     | 1.8333       | 0.1039     | 1.0955       |
| 9      | 321m 100 ug                   | 6245622.67  | 1329160.71 | 4.6996    | 12791153.99 | 0.4883     | 1.4322       | 0.1039     | 1.0951       |

| Gel 17 |                               |            |            |           |             |            |              |            |              |
|--------|-------------------------------|------------|------------|-----------|-------------|------------|--------------|------------|--------------|
| Lane   | Sample ID and protein loading | PR-A       | PR-B       | PR-A/PR-B | GAPDH       | PR-A/GAPDH | Rel to CAHm* | PR-B/GAPDH | Rel to CAHm* |
| 1      | 13mng 50 ug                   | 4065868.51 | 843094.85  | 4.8226    | 11073733.54 | 0.3672     | 1.7959       | 0.0761     | 2.6991       |
| 2      | 13mng 100 ug                  | 4745297.48 | 1090774.70 | 4.3504    | 10077833.03 | 0.4709     | 2.3031       | 0.1082     | 3.8371       |
| 3      | CAHm 100 ug                   | 2091520.43 | 288564.77  | 7.2480    | 10229944.67 | 0.2045     | 1.0000       | 0.0282     | 1.0000       |
| 4      | 52mng 50 ug                   | 9034312.13 | 952820.41  | 9.4817    | 8197848.11  | 1.1020     | 5.3902       | 0.1162     | 4.1204       |
| 5      | 52mng 100 ug                  | 8730028.68 | 935355.18  | 9.3334    | 8522425.25  | 1.0244     | 5.0103       | 0.1098     | 3.8908       |
| 6      | 310m 50 ug                    | 1310099.74 | 264679.86  | 4.9498    | 11895227.75 | 0.1101     | 0.5387       | 0.0223     | 0.7888       |
| 7      | 310m 100 ug                   | 1608930.79 | 508294.88  | 3.1653    | 13735884.69 | 0.1171     | 0.5729       | 0.0370     | 1.3119       |

| Gel 18 |                               |             |            |           |             |            |              |            |              |
|--------|-------------------------------|-------------|------------|-----------|-------------|------------|--------------|------------|--------------|
| Lane   | Sample ID and protein loading | PR-A        | PR-B       | PR-A/PR-B | GAPDH       | PR-A/GAPDH | Rel to CAHm* | PR-B/GAPDH | Rel to CAHm* |
| 1      | 86mng 50 ug                   | 18162290.24 | 4576726.88 | 3.9684    | 1534034.50  | 1.1839     | 2.8883       | 0.2963     | 3.3348       |
| 2      | 86mng 100 ug                  | 23460977.61 | 7760643.26 | 3.0231    | 13343412.14 | 1.7582     | 4.2893       | 0.5616     | 6.5012       |
| 3      | 26mng 50 ug                   | 31292198.61 | 5710334.04 | 5.4799    | 1197310.08  | 2.6126     | 6.3736       | 0.4768     | 5.3292       |
| 4      | 26mng 100 ug                  | 32674005.83 | 6480782.97 | 5.0417    | 15140893.00 | 2.1580     | 5.2645       | 0.4280     | 4.7845       |
| 5      | CAHm 100 ug                   | 4891104.11  | 1067469.21 | 4.5820    | 11932094.38 | 0.4099     | 1.0000       | 0.0895     | 1.0000       |

| Gel 19 |                               |             |            |           |             |            |              |            |              |
|--------|-------------------------------|-------------|------------|-----------|-------------|------------|--------------|------------|--------------|
| Lane   | Sample ID and protein loading | PR-A        | PR-B       | PR-A/PR-B | GAPDH       | PR-A/GAPDH | Rel to CAHm* | PR-B/GAPDH | Rel to CAHm* |
| 1      | 214m 50 ug                    | 5610940.05  | 1873417.00 | 2.9950    | 25182533.86 | 0.2228     | 0.4013       | 0.0744     | 0.5451       |
| 2      | 214m 100 ug                   | 8035079.81  | 2990928.56 | 2.6865    | 26263877.60 | 0.3059     | 0.5510       | 0.1139     | 0.8344       |
| 3      | 214mng 50 ug                  | 15893590.45 | 2951085.80 | 5.3857    | 18087065.37 | 0.8787     | 1.5826       | 0.1632     | 1.1954       |
| 4      | 64m 50 ug                     | 16286469.45 | 270852.58  | 6.0056    | 21539109.68 | 0.7552     | 1.3602       | 0.1258     | 0.9214       |
| 5      | 64m 100 ug                    | 16729651.07 | 5413658.96 | 3.0903    | 31200419.29 | 0.5362     | 0.9657       | 0.1735     | 1.2713       |
| 6      | CAHm 100 ug                   | 10116097.65 | 2486609.23 | 4.0682    | 18218720.47 | 0.5553     | 1.0000       | 0.1365     | 1.0000       |
| 7      | 217m 50 ug                    | 10733615.82 | 2271882.50 | 4.7250    | 27783443.03 | 0.3863     | 0.6958       | 0.0818     | 0.5991       |
| 8      | 217m 100 ug                   | 20193729.00 | 4811666.36 | 4.1968    | 25948107.74 | 0.7782     | 1.4016       | 0.1854     | 1.3586       |
| 9      | 658m 50 ug                    | 21294070.74 | 4827443.03 | 4.4110    | 19779742.56 | 1.0766     | 1.9388       | 0.2441     | 1.7882       |
| 10     | 658m 100 ug                   | 27661880.04 | 8581949.65 | 3.2233    | 26027484.93 | 1.0628     | 1.9141       | 0.3297     | 2.4158       |

\*. sample used as calibrator
