# Supplementary material for: Progesterone Receptor Expression Declines in the Guinea Pig Uterus during Functional Progesterone Withdrawal and in Response to Prostaglandins
Source: PubMed Central journal article supplement (PMC4144885; doi:10.1371/journal.pone.0105253), 2014-08-26
Supplement: pone.0105253.s009.pdf [file pone.0105253.s009.pdf]

**Table S2**

**Guinea Pig Uterine Estrogen Receptor Protein (ESR1) Levels During Pregnancy  
(Arbitrary Densitometric Units)**

| <b>Gel 1</b> |                                            |            |             |            |              |
|--------------|--------------------------------------------|------------|-------------|------------|--------------|
| Lane         | Sample ID <sup>s</sup> and protein loading | ESR1       | GAPDH       | ESR1/GAPDH | Rel to T47D* |
| 1            | 31m 60 µg                                  | 2813575.44 | 49785710.00 | 0.0565     | 0.3911       |
| 2            | 31m 60 µg                                  | 2954729.70 | 44245540.93 | 0.0668     | 0.4621       |
| 3            | 15m 60 µg                                  | 2265224.38 | 72454050.10 | 0.0313     | 0.2164       |
| 4            | 15m 60 µg                                  | 2378301.45 | 66258636.68 | 0.0359     | 0.2484       |
| 5            | T47D 20 µg                                 | 4546421.00 | 31463131.68 | 0.1445     | 1.0000       |
| 6            | 7m 60 µg                                   | 3162714.50 | 68242181.88 | 0.0463     | 0.3207       |
| 7            | 7m 60 µg                                   | 3141394.17 | 58147880.59 | 0.0540     | 0.3739       |
| 8            | 18m 60 µg                                  | 1802218.33 | 88921226.97 | 0.0203     | 0.1403       |
| 9            | 18m 60 µg                                  | 1780962.05 | 88425422.83 | 0.0201     | 0.1394       |

  

| <b>Gel 2</b> |                                            |             |             |            |              |
|--------------|--------------------------------------------|-------------|-------------|------------|--------------|
| Lane         | Sample ID <sup>s</sup> and protein loading | ESR1        | GAPDH       | ESR1/GAPDH | Rel to T47D* |
| 1            | 19m 60 µg                                  | 9798104.55  | 42270564.65 | 0.2318     | 0.4371       |
| 2            | L1m 60 µg                                  | 4834981.83  | 53280969.31 | 0.0907     | 0.1711       |
| 3            | L1m 60 µg                                  | 5578929.27  | 54285739.00 | 0.1028     | 0.1938       |
| 4            | T47D 20 µg                                 | 12770042.90 | 24083100.26 | 0.5302     | 1.0000       |
| 5            | CAHm 60 µg                                 | 9072497.51  | 47814387.77 | 0.1897     | 0.3578       |
| 6            | CAHm 60 µg                                 | 7000007.91  | 45031780.75 | 0.1554     | 0.2932       |
| 7            | 35m 60 µg                                  | 9866401.71  | 56595631.76 | 0.1743     | 0.3288       |
| 8            | 35m 60 µg                                  | 9770673.50  | 75884707.48 | 0.1288     | 0.2428       |

  

| <b>Gel 3</b> |                                            |             |             |            |              |
|--------------|--------------------------------------------|-------------|-------------|------------|--------------|
| Lane         | Sample ID <sup>s</sup> and protein loading | ESR1        | GAPDH       | ESR1/GAPDH | Rel to T47D* |
| 1            | 13m 60 µg                                  | 17527265.12 | 9584863.88  | 1.8286     | 0.6387       |
| 2            | 13m 60 µg                                  | 17687270.04 | 9333413.58  | 1.8950     | 0.6619       |
| 3            | 13mng 60 µg                                | 14496152.55 | 6826386.96  | 2.1235     | 0.7417       |
| 4            | 13mng 60 µg                                | 14969824.55 | 7137152.81  | 2.0975     | 0.7326       |
| 5            | T47D 20 µg                                 | 15215352.76 | 5314151.72  | 2.8632     | 1.0000       |
| 6            | 20m 60 µg                                  | 17153065.91 | 10150930.73 | 1.6898     | 0.5902       |
| 7            | 20m 60 µg                                  | 15492563.23 | 10328106.13 | 1.5000     | 0.5239       |
| 8            | 14m 60 µg                                  | 13425258.11 | 11165257.72 | 1.2024     | 0.4200       |
| 9            | 14m 60 µg                                  | 13865852.00 | 11976583.65 | 1.1577     | 0.4044       |

  

| <b>Gel 4</b> |                                            |             |             |            |              |
|--------------|--------------------------------------------|-------------|-------------|------------|--------------|
| Lane         | Sample ID <sup>s</sup> and protein loading | ESR1        | GAPDH       | ESR1/GAPDH | Rel to T47D* |
| 1            | L3m 60 µg                                  | 8341065.21  | 9882429.03  | 0.8440     | 0.2704       |
| 2            | L3m 60 µg                                  | 8590702.18  | 10148761.75 | 0.8465     | 0.2712       |
| 3            | L3mng 60 µg                                | 20829713.43 | 9611818.77  | 2.1671     | 0.6942       |
| 4            | L3mng 60 µg                                | 20063982.98 | 11112873.21 | 1.8055     | 0.5783       |
| 5            | T47D 20 µg                                 | 17690851.00 | 5666874.40  | 3.1218     | 1.0000       |
| 6            | 38m 60 µg                                  | 20771882.50 | 9607968.28  | 2.1619     | 0.6925       |
| 7            | 38m 60 µg                                  | 20077036.92 | 10407540.88 | 1.9291     | 0.6179       |
| 8            | 75m 60 µg                                  | 22039057.00 | 12003254.61 | 1.8361     | 0.5882       |
| 9            | 75m 60 µg                                  | 21908512.73 | 13657014.24 | 1.6042     | 0.5139       |

  

| <b>Gel 5</b> |                                            |             |             |            |              |
|--------------|--------------------------------------------|-------------|-------------|------------|--------------|
| Lane         | Sample ID <sup>s</sup> and protein loading | ESR1        | GAPDH       | ESR1/GAPDH | Rel to T47D* |
| 1            | 37m 60 µg                                  | 7129955.57  | 14020901.08 | 0.5085     | 0.5404       |
| 2            | 37m 60 µg                                  | 7588054.76  | 14434414.37 | 0.5257     | 0.5586       |
| 3            | 66m 60 µg                                  | 7719322.50  | 13636536.36 | 0.5661     | 0.6016       |
| 4            | 66m 60 µg                                  | 7380379.72  | 13995561.10 | 0.5273     | 0.5604       |
| 5            | T47D 20 µg                                 | 7152663.67  | 7600900.43  | 0.9410     | 1.0000       |
| 6            | 25m 60 µg                                  | 6696166.07  | 14179924.90 | 0.4722     | 0.5018       |
| 7            | 25m 60 µg                                  | 7688479.25  | 12382899.35 | 0.6209     | 0.6598       |
| 8            | L4m 60 µg                                  | 24112107.50 | 13423744.09 | 1.7962     | 1.9088       |
| 9            | L4m 60 µg                                  | 22891828.67 | 14046587.23 | 1.6297     | 1.7318       |

  

| <b>Gel 6</b> |                                            |             |             |            |              |
|--------------|--------------------------------------------|-------------|-------------|------------|--------------|
| Lane         | Sample ID <sup>s</sup> and protein loading | ESR1        | GAPDH       | ESR1/GAPDH | Rel to T47D* |
| 1            | 51m 60 µg                                  | 3806065.13  | 15413353.75 | 0.2469     | 0.4184       |
| 2            | 51m 60 µg                                  | 2951590.55  | 14332255.46 | 0.2059     | 0.3490       |
| 3            | 94m 60 µg                                  | 2180562.71  | 15225113.92 | 0.1432     | 0.2427       |
| 4            | 94m 60 µg                                  | 2154526.57  | 15214687.41 | 0.1416     | 0.2400       |
| 5            | T47D 20 µg                                 | 4909981.08  | 8320060.75  | 0.5901     | 1.0000       |
| 6            | 52m 60 µg                                  | 6101338.56  | 15261776.26 | 0.3998     | 0.6774       |
| 7            | 52m 60 µg                                  | 6225957.64  | 17053121.64 | 0.3651     | 0.6187       |
| 8            | 52mng 60 µg                                | 10906887.33 | 15541481.06 | 0.7018     | 1.1892       |
| 9            | 52mng 60 µg                                | 11675339.4  | 19202143.08 | 0.6080     | 1.0303       |

  

| <b>Gel 7</b> |                                            |             |             |            |              |
|--------------|--------------------------------------------|-------------|-------------|------------|--------------|
| Lane         | Sample ID <sup>s</sup> and protein loading | ESR1        | GAPDH       | ESR1/GAPDH | Rel to T47D* |
| 1            | 58m 60 µg                                  | 7805740.33  | 14705065.57 | 0.5308     | 0.3922       |
| 2            | 58m 60 µg                                  | 7342023.00  | 10363124.69 | 0.7085     | 0.5234       |
| 3            | 26m 60 µg                                  | 6410287.39  | 14089882.28 | 0.4550     | 0.3361       |
| 4            | 26m 60 µg                                  | 6294653.64  | 10186563.77 | 0.6179     | 0.4565       |
| 5            | T47D 20 µg                                 | 7625886.00  | 5633967.25  | 1.3536     | 1.0000       |
| 6            | 26mng 60 µg                                | 12409900.71 | 7126445.24  | 1.7414     | 1.2865       |
| 7            | 26mng 60 µg                                | 11813445.57 | 7157250.89  | 1.6506     | 1.2194       |

|   |           |            |             |        |        |
|---|-----------|------------|-------------|--------|--------|
| 8 | L5m 60 µg | 7580237.87 | 11003142.76 | 0.6889 | 0.5090 |
| 9 | L5m 60 µg | 6881063.59 | 12010517.46 | 0.5729 | 0.4233 |

**Gel 8**

| Lane | Sample ID <sup>§</sup> and protein loading | ESR1       | GAPDH       | ESR1/GAPDH | Rel to T47D* |
|------|--------------------------------------------|------------|-------------|------------|--------------|
| 1    | 74m 60 µg                                  | 4648525.86 | 8230686.60  | 0.5648     | 0.4295       |
| 2    | 74m 60 µg                                  | 4418417.00 | 7322931.73  | 0.6034     | 0.4589       |
| 3    | 95m 60 µg                                  | 4510813.58 | 7666127.36  | 0.5884     | 0.4475       |
| 4    | 95m 60 µg                                  | 4769647.00 | 8229168.31  | 0.5796     | 0.4408       |
| 5    | T47D 20 µg                                 | 7828945.21 | 5953921.86  | 1.3149     | 1.0000       |
| 6    | 81m 60 µg                                  | 5546212.25 | 10070461.30 | 0.5507     | 0.4188       |
| 7    | 81m 60 µg                                  | 5606342.19 | 8755614.65  | 0.6403     | 0.4870       |
| 8    | 84m 60 µg                                  | 8005492.23 | 9928900.26  | 0.8063     | 0.6132       |
| 9    | 84m 60 µg                                  | 8781563.83 | 11490525.59 | 0.7642     | 0.5812       |

**Gel 9**

| Lane | Sample ID <sup>§</sup> and protein loading | ESR1       | GAPDH       | ESR1/GAPDH | Rel to T47D* |
|------|--------------------------------------------|------------|-------------|------------|--------------|
| 1    | 29myo 50 µg                                | 5460741.10 | 31274237.64 | 0.1746     | 0.5811       |
| 2    | 29myo 50 µg                                | 6114347.59 | 21717955.28 | 0.2815     | 0.9370       |
| 3    | L6myo 50 µg                                | 7491156.00 | 15510163.37 | 0.4830     | 1.6074       |
| 4    | L6myo 50 µg                                | 6814371.84 | 15894779.87 | 0.4287     | 1.4268       |
| 5    | T47D 20 µg                                 | 2915829.00 | 9704152.86  | 0.3005     | 1.0000       |
| 6    | 217myo 50 µg                               | 7232612.60 | 9456376.39  | 0.7648     | 2.5455       |
| 7    | 217myo 50 µg                               | 7746274.00 | 11175143.13 | 0.6932     | 2.3069       |
| 8    | 100myo 50 µg                               | 6124180.92 | 13907202.98 | 0.4404     | 1.4656       |
| 9    | 100myo 50 µg                               | 4373459.89 | 15371226.86 | 0.2845     | 0.9469       |

**Gel 10**

| Lane | Sample ID <sup>§</sup> and protein loading | ESR1       | GAPDH       | ESR1/GAPDH | Rel to T47D* |
|------|--------------------------------------------|------------|-------------|------------|--------------|
| 1    | 322m 50 µg                                 | 4739486.59 | 10873426.97 | 0.4359     | 1.0424       |
| 2    | 322m 50 µg                                 | 6265092.19 | 9261899.95  | 0.6764     | 1.6177       |
| 3    | 86m 50 µg                                  | 3943028.00 | 16969744.60 | 0.2324     | 0.5557       |
| 4    | 86m 50 µg                                  | 3880215.28 | 21455094.74 | 0.1809     | 0.4325       |
| 5    | T47D 20 µg                                 | 5310375.56 | 12699502.65 | 0.4182     | 1.0000       |
| 6    | 86mng 50 µg                                | 8682527.15 | 12592651.42 | 0.6895     | 1.6489       |
| 7    | 86mng 50 µg                                | 8000749.60 | 13041255.45 | 0.6135     | 1.4671       |
| 8    | 214m 50 µg                                 | 8359927.00 | 24620606.43 | 0.3396     | 0.8120       |
| 9    | 214m 50 µg                                 | 4884126.59 | 28255194.79 | 0.1729     | 0.4134       |

**Gel 11**

| Lane | Sample ID <sup>§</sup> and protein loading | ESR1        | GAPDH      | ESR1/GAPDH | Rel to T47D* |
|------|--------------------------------------------|-------------|------------|------------|--------------|
| 1    | 214mng 50 µg                               | 10847905.96 | 8937988.43 | 1.2137     | 1.0282       |
| 2    | 214mng 50 µg                               | 12371951.43 | 7337958.46 | 1.6860     | 1.4283       |
| 3    | L7m 50 µg                                  | 6815134.81  | 7834188.60 | 0.8699     | 0.7370       |
| 4    | L7m 50 µg                                  | 6452510.96  | 6885321.76 | 0.9371     | 0.7939       |
| 5    | T47D 20 µg                                 | 5549948.67  | 4701644.52 | 1.1804     | 1.0000       |
| 6    | 296m 50 µg                                 | 5128339.91  | 3833028.71 | 1.3379     | 1.1334       |
| 7    | 296m 50 µg                                 | 5209808.31  | 3729376.08 | 1.3970     | 1.1834       |
| 8    | 294m 50 µg                                 | 16718958.57 | 4169734.42 | 4.0096     | 3.3967       |
| 9    | 294m 50 µg                                 | 14919943.75 | 4238392.41 | 3.5202     | 2.9821       |

**Gel 12**

| Lane | Sample ID <sup>§</sup> and protein loading | ESR1        | GAPDH       | ESR1/GAPDH | Rel to T47D* |
|------|--------------------------------------------|-------------|-------------|------------|--------------|
| 1    | 295m 50 µg                                 | 4810918.65  | 10979190.45 | 0.4382     | 0.2562       |
| 2    | 295m 50 µg                                 | 4661696.45  | 9403229.43  | 0.4958     | 0.2898       |
| 3    | 295mng 50 µg                               | 10151980.85 | 8908085.94  | 1.1396     | 0.6662       |
| 4    | 295mng 50 µg                               | 11001518.88 | 8940662.52  | 1.2305     | 0.7194       |
| 5    | T47D 20 µg                                 | 10265604.32 | 6001420.00  | 1.7105     | 1.0000       |
| 6    | 258m 50 µg                                 | 6113928.79  | 9031714.56  | 0.6769     | 0.3957       |
| 7    | 258m 50 µg                                 | 6620321.97  | 9155152.62  | 0.7231     | 0.4227       |
| 8    | 258mng 50 µg                               | 10869563.63 | 9153283.72  | 1.1875     | 0.6942       |
| 9    | 258mng 50 µg                               | 8643259.54  | 8144580.47  | 1.0612     | 0.6204       |

**Gel 13**

| Lane | Sample ID <sup>§</sup> and protein loading | ESR1        | GAPDH       | ESR1/GAPDH | Rel to T47D* |
|------|--------------------------------------------|-------------|-------------|------------|--------------|
| 1    | 263m 50 µg                                 | 24769819.89 | 44761694.8  | 0.5534     | 0.5866       |
| 2    | 263m 50 µg                                 | 26783932.61 | 40291032.95 | 0.6648     | 0.7047       |
| 3    | 321m 50 µg                                 | 29665297.11 | 6519077.18  | 4.5505     | 4.8240       |
| 4    | 321m 50 µg                                 | 29021103.61 | 6414367.45  | 4.5244     | 4.7963       |
| 5    | T47D 20 µg                                 | 25041095.11 | 26545903.57 | 0.9433     | 1.0000       |
| 6    | 658m 50 µg                                 | 46625463.71 | 27810748    | 1.6765     | 1.7773       |
| 7    | 658m 50 µg                                 | 43506917.19 | 28006247.19 | 1.5535     | 1.6468       |
| 8    | 649m 50 µg                                 | 29222970.3  | 29516607.88 | 0.9901     | 1.0495       |
| 9    | 649m 50 µg                                 | 2770921.75  | 3540214.67  | 0.7827     | 0.8297       |

**Gel 14**

| Lane | Sample ID <sup>§</sup> and protein loading | ESR1        | GAPDH       | ESR1/GAPDH | Rel to T47D* |
|------|--------------------------------------------|-------------|-------------|------------|--------------|
| 1    | 329m 50 µg                                 | 37388121.00 | 10138325.66 | 3.6878     | 1.4738       |
| 2    | 329m 50 µg                                 | 36631683.43 | 8418990.61  | 4.3511     | 1.7389       |
| 3    | 329mng 50 µg                               | 40948057.00 | 9122734.33  | 4.4886     | 1.7938       |
| 4    | 310m 50 µg                                 | 45391312.87 | 16628775.66 | 2.7297     | 1.0909       |
| 5    | T47D 20 µg                                 | 33873419.75 | 13537234.59 | 2.5022     | 1.0000       |
| 6    | 310m 50 µg                                 | 41954106.62 | 18633127.10 | 2.2516     | 0.8998       |

\* T47D cell extract used as calibrator

§, see Supplementary Table S1 for Key to Sample ID
