# Supplementary material for: Progesterone Receptor Expression Declines in the Guinea Pig Uterus during Functional Progesterone Withdrawal and in Response to Prostaglandins
Source: PubMed Central journal article supplement (PMC4144885; doi:10.1371/journal.pone.0105253), 2014-08-26
Supplement: pone.0105253.s010.pdf [file pone.0105253.s010.pdf]

Table S3

Effect of Sulprostone on Guinea Pig Uterine Progesterone Receptor and Estrogen Receptor Protein Levels

| Key to Sample ID                                        |                           |
|---------------------------------------------------------|---------------------------|
| Vehicle                                                 | Sulprostone               |
| 452m                                                    | 646m, mng                 |
| 454m, mng                                               | 403m                      |
| 456m                                                    | 441m*                     |
| 416m                                                    | 442m                      |
| 459m, mng                                               | 443m                      |
| 648m                                                    | 641m                      |
| 678m                                                    | 677m                      |
| 685m, mng                                               | 686m                      |
|                                                         | Fluprostenol <sup>#</sup> |
|                                                         | 426m                      |
|                                                         | 370m                      |
| mng, non-gravid horn (not evaluated)                    |                           |
| <sup>#</sup> , Fluprostenol treatment was not evaluated |                           |

Progesterone Receptor (PRA and PRB, arbitrary densitometric units)

| Lane | Sample ID and protein loading | Gel 1       |            |         |             |            |              |            |              |
|------|-------------------------------|-------------|------------|---------|-------------|------------|--------------|------------|--------------|
|      |                               | PR-A        | PR-B       | PR-A/B  | GAPDH       | PR-A/GAPDH | Rel to 441m* | PR-B/GAPDH | Rel to 441m* |
| 1    | 452m 50µg                     | 6375565     | 1343273.94 | 4.7463  | 4977665.68  | 0.1281     | 1.2538       | 0.0270     | 1.0293       |
| 2    | 646m 50µg                     | 4390335.39  | 786240.83  | 5.5954  | 43162812    | 0.1019     | 0.9978       | 0.0182     | 0.6948       |
| 3    | 646mng 50µg                   | 2960456.71  | 183471.07  | 16.1358 | 50580321.94 | 0.0585     | 0.5730       | 0.0036     | 0.1383       |
| 4    | 441m 50µg                     | 4830324.11  | 1239750.94 | 3.8962  | 47285408.45 | 0.1022     | 1.0000       | 0.0262     | 1.0000       |
| 5    | 403m 50µg                     | 6123354     | 690911.47  | 8.8627  | 43962091.06 | 0.1392     | 1.3629       | 0.0157     | 0.5992       |
| 6    | 454m 50µg                     | 4711611.14  | 593982.69  | 7.9322  | 44170920.59 | 0.1067     | 1.0442       | 0.0134     | 0.5129       |
| 7    | 454mng 50µg                   | 15587638.77 | 1401901.5  | 11.1189 | 44826385.28 | 0.3477     | 3.4041       | 0.0313     | 1.1928       |
| 8    | 456m 50µg                     | 4084540.23  | 596847.88  | 6.8435  | 42204464.51 | 0.0968     | 0.9474       | 0.0141     | 0.5394       |
| 9    | 442m 50µg                     | 3140286.33  | 584208     | 5.3753  | 39884244.66 | 0.0787     | 0.7708       | 0.0146     | 0.5587       |

  

| Lane | Sample ID and protein loading | Gel 2       |            |        |             |            |              |            |              |
|------|-------------------------------|-------------|------------|--------|-------------|------------|--------------|------------|--------------|
|      |                               | PR-A        | PR-B       | PR-A/B | GAPDH       | PR-A/GAPDH | Rel to 441m* | PR-B/GAPDH | Rel to 441m* |
| 1    | 416m 50µg                     | 7970483.75  | 1289853.6  | 6.1794 | 45804916.37 | 0.1740     | 1.8557       | 0.0282     | 1.0880       |
| 2    | 443m 50µg                     | 4850502.14  | 1209442.88 | 4.0105 | 44166703.53 | 0.1098     | 1.1712       | 0.0274     | 1.0580       |
| 3    | 641m 50µg                     | 2725008.05  | 579509.9   | 4.7023 | 47744801.39 | 0.0574     | 0.6087       | 0.0121     | 0.4689       |
| 4    | 441m 50µg                     | 3814370.12  | 1052881.94 | 3.6228 | 40678133.84 | 0.0938     | 1.0000       | 0.0259     | 1.0000       |
| 5    | 459m 50µg                     | 9231962.23  | 1074567.6  | 8.5913 | 47605250.48 | 0.1939     | 2.0681       | 0.0226     | 0.8721       |
| 6    | 459mng 50µg                   | 29347591.88 | 3866837.59 | 7.5896 | 49814208.54 | 0.5891     | 6.2829       | 0.0776     | 2.9991       |
| 7    | 677m 50µg                     | 3708217.38  | 621750     | 5.9642 | 40331928.02 | 0.0919     | 0.9805       | 0.0154     | 0.5956       |
| 8    | 648m 50µg                     | 4955888     | 782801     | 6.3310 | 4435695.3   | 0.1117     | 1.1915       | 0.0176     | 0.6818       |
| 9    | 678m 50µg                     | 4462711.44  | 677279.4   | 6.5892 | 41191270.63 | 0.1083     | 1.1554       | 0.0164     | 0.6352       |

  

| Lane | Sample ID and protein loading | Gel 3        |            |         |             |            |              |            |              |
|------|-------------------------------|--------------|------------|---------|-------------|------------|--------------|------------|--------------|
|      |                               | PR-A         | PR-B       | PR-A/B  | GAPDH       | PR-A/GAPDH | Rel to 441m* | PR-B/GAPDH | Rel to 441m* |
| 1    | 686m 50µg                     | 2409653.94   | 281462.76  | 8.5612  | 98999861.45 | 0.0243     | 0.3236       | 0.0028     | 0.2763       |
| 2    | 370m 50µg                     | 439068152.83 | 9294774    | 4.6915  | 105289890   | 0.4142     | 5.5065       | 0.0883     | 8.5806       |
| 3    | 426m 50µg                     | 12903152.08  | 1068338.5  | 12.0778 | 109964991   | 0.1173     | 1.5601       | 0.0097     | 0.9443       |
| 4    | 441m 50µg                     | 8454147.05   | 1159416.55 | 7.3106  | 112403613.9 | 0.0752     | 1.0000       | 0.0103     | 1.0000       |
| 5    | 685m 50µg                     | 16490085.76  | 185533.65  | 8.4308  | 113269807.6 | 0.1456     | 1.9357       | 0.0173     | 1.8765       |
| 6    | 685mng 50µg                   | 12201709.32  | 662692.25  | 18.4123 | 104972872.3 | 0.1162     | 1.5454       | 0.0063     | 0.6136       |

\* , sample used as calibrator

Estrogen Receptor (ESR1, arbitrary densitometric units)

| Lane | Sample ID and protein loading | Gel 1       |             |            |              |
|------|-------------------------------|-------------|-------------|------------|--------------|
|      |                               | ESR1        | GAPDH       | ESR1/GAPDH | Rel to 443m* |
| 1    | 452m 40µg                     | 10692931.80 | 668132.03   | 16.0037    | 32.5525      |
| 2    | 452m 40µg                     | 18050321.33 | 637571.35   | 16.9429    | 34.4629      |
| 3    | 646m 40µg                     | 13513578.24 | 11392419.42 | 1.1862     | 2.4128       |
| 4    | 646m 40µg                     | 12193794.09 | 11763062.00 | 1.0366     | 2.1085       |
| 5    | 443m 40µg                     | 10536540.00 | 21431916.28 | 0.4916     | 1.0000       |
| 6    | 646mng 40µg                   | 23876224.17 | 464791.25   | 50.9395    | 103.6138     |
| 7    | 646mng 40µg                   | 22519067.80 | 519216.04   | 43.3713    | 88.2196      |
| 8    | 403m 40µg                     | 23154253.85 | 556864.25   | 41.5797    | 84.5755      |
| 9    | 403m 40µg                     | 20505076.35 | 458451.91   | 44.7268    | 90.9788      |

  

| Lane | Sample ID and protein loading | Gel 2       |             |            |              |
|------|-------------------------------|-------------|-------------|------------|--------------|
|      |                               | ESR1        | GAPDH       | ESR1/GAPDH | Rel to 443m* |
| 1    | 454m 40µg                     | 14403079.32 | 3777675.33  | 3.8127     | 8.2953       |
| 2    | 454m 40µg                     | 14166888.60 | 2992267.20  | 4.7345     | 10.3009      |
| 3    | 454mng 40µg                   | 13342171.33 | 1968668.47  | 0.6777     | 1.4745       |
| 4    | 454mng 40µg                   | 16667853.38 | 18000169.44 | 0.9260     | 2.0147       |
| 5    | 443m 40µg                     | 11525087.33 | 25075310.57 | 0.4596     | 1.0000       |
| 6    | 441m 40µg                     | 7070268.00  | 34400147.00 | 0.2055     | 0.4472       |
| 7    | 441m 40µg                     | 7390506.41  | 33157905.15 | 0.2229     | 0.4849       |
| 8    | 456m 40µg                     | 27223534.79 | 735894.32   | 36.9918    | 80.4536      |
| 9    | 456m 40µg                     | 24118392.59 | 570704.06   | 42.2608    | 91.9474      |

  

| Lane | Sample ID and protein loading | Gel 3       |             |            |              |
|------|-------------------------------|-------------|-------------|------------|--------------|
|      |                               | ESR1        | GAPDH       | ESR1/GAPDH | Rel to 443m* |
| 1    | 442m 40µg                     | 29501883.87 | 3410397.41  | 8.6506     | 16.6642      |
| 2    | 442m 40µg                     | 28136345.93 | 2536590.03  | 11.0922    | 21.3676      |
| 3    | 416m 40µg                     | 11737221.25 | 6483680.03  | 1.8103     | 3.4872       |
| 4    | 416m 40µg                     | 10854423.47 | 5773839.56  | 1.8799     | 3.6214       |
| 5    | 443m 40µg                     | 14846233.74 | 28217878.67 | 0.5191     | 1.0000       |
| 6    | 443m 40µg                     | 14640270.94 | 30236973.75 | 0.4842     | 0.9327       |
| 7    | 443m 40µg                     | 15160125.77 | 31080733.34 | 0.4878     | 0.9396       |
| 8    | 641m 40µg                     | 13464116.00 | 14577951.48 | 0.9236     | 1.7792       |
| 9    | 641m 40µg                     | 13091619.00 | 13149944.06 | 0.9956     | 1.9178       |

  

| Lane | Sample ID and protein loading | Gel 4       |             |            |              |
|------|-------------------------------|-------------|-------------|------------|--------------|
|      |                               | ESR1        | GAPDH       | ESR1/GAPDH | Rel to 443m* |
| 1    | 459m 40µg                     | 11022707.33 | 4012905.18  | 2.7488     | 4.9350       |
| 2    | 459m 40µg                     | 11548055.35 | 3241401.96  | 3.5527     | 6.4008       |
| 3    | 459mng 40µg                   | 12436321.59 | 48691905.85 | 0.2554     | 0.4589       |
| 4    | 459mng 40µg                   | 14873003.14 | 44325031.18 | 0.3355     | 0.6028       |
| 5    | 443m 40µg                     | 13122747.06 | 23576530.81 | 0.5566     | 1.0000       |
| 6    | 677m 40µg                     | 15617609.11 | 10550559.48 | 1.4803     | 2.6585       |
| 7    | 677m 40µg                     | 16236841.73 | 11603806.77 | 1.3993     | 2.5139       |
| 8    | 648m 40µg                     | 20191794.68 | 2534199.92  | 7.9677     | 14.3149      |
| 9    | 648m 40µg                     | 15743552.25 | 1834383.15  | 8.5825     | 15.4194      |

  

| Lane | Sample ID and protein loading | Gel 5       |             |            |              |
|------|-------------------------------|-------------|-------------|------------|--------------|
|      |                               | ESR1        | GAPDH       | ESR1/GAPDH | Rel to 443m* |
| 1    | 678m 40µg                     | 12730729.00 | 4466505.10  | 2.8503     | 8.8283       |
| 2    | 678m 40µg                     | 14517292.13 | 4024841.13  | 3.6069     | 11.1720      |
| 3    | 686m 40µg                     | 30450312.23 | 3276763.79  | 9.2928     | 28.7832      |
| 4    | 686m 40µg                     | 28491768.00 | 3197389.73  | 8.9378     | 27.5907      |
| 5    | 443m 40µg                     | 11847533.21 | 36696112.36 | 0.3229     | 1.0000       |
| 6    | 685m 40µg                     | 12420338.28 | 12618439.57 | 0.9843     | 3.0487       |
| 7    | 685m 40µg                     | 12084419.90 | 12279422.77 | 0.9841     | 3.0482       |
| 8    | 685mng 40µg                   | 26393105.71 | 1585641.84  | 16.5387    | 51.2263      |
| 9    | 685mng 40µg                   | 21471935.76 | 1954023.70  | 10.9886    | 34.0356      |

  

| Lane | Sample ID and protein loading | Gel 6       |             |            |              |
|------|-------------------------------|-------------|-------------|------------|--------------|
|      |                               | ESR1        | GAPDH       | ESR1/GAPDH | Rel to 443m* |
| 1    | 370m 40µg                     | 12864582.50 | 44270344.00 | 0.2906     | 0.3208       |
| 2    | 370m 40µg                     | 13955537.67 | 45532124.00 | 0.2986     | 0.3296       |
| 3    | 426m 40µg                     | 19561564.24 | 35010490.00 | 0.5587     | 0.6167       |
| 4    | 426m 40µg                     | 21141779.94 | 39786163.00 | 0.5314     | 0.5865       |
| 5    | 443m 40µg                     | 20563424.71 | 22696935.00 | 0.9060     | 1.0000       |

\* , sample used as calibrator
