# Supplementary material for: Progesterone Receptor Expression Declines in the Guinea Pig Uterus during Functional Progesterone Withdrawal and in Response to Prostaglandins
Source: PubMed Central journal article supplement (PMC4144885; doi:10.1371/journal.pone.0105253), 2014-08-26
Supplement: pone.0105253.s011.pdf [file pone.0105253.s011.pdf]

Table S4

Effect of Piroxicam on Guinea Pig Uterine Progesterone Receptor and Estrogen Receptor Protein Levels

| Key to Sample ID     |           |
|----------------------|-----------|
| Vehicle              | Piroxicam |
| 695m*, mng           | 734m      |
| 738m                 | 795m      |
| 761m                 | 796m      |
| 763m                 | 768m      |
| 808m                 | 799m      |
| 863m                 | 857m, mng |
| 865m                 | 822m      |
|                      | 814m, mng |
| mng, non-gravid horn |           |

Progesterone Receptor (PRA and PRB, arbitrary densitometric units)

|      |                               | Gel 1       |             |        |              |            |              |            |              |
|------|-------------------------------|-------------|-------------|--------|--------------|------------|--------------|------------|--------------|
| Lane | Sample ID and protein loading | PR-A        | PR-B        | PR-A/B | GAPDH        | PR-A/GAPDH | Rel to 695m* | PR-B/GAPDH | Rel to 695m* |
| 1    | 734m 50 ug                    | 7522755.04  | 9044939.45  | 0.8317 | 10902800.10  | 0.0690     | 0.9966       | 0.0830     | 1.0861       |
| 2    | 734m 75 ug                    | 12050962.65 | 17068676.37 | 0.7060 | 128057712.88 | 0.0941     | 1.3592       | 0.1333     | 1.7450       |
| 3    | 795m 50 ug                    | 11855205.48 | 19056241.91 | 0.6221 | 130190771.21 | 0.0911     | 1.3152       | 0.1464     | 1.9163       |
| 4    | 795m 100 ug                   | 9829239.42  | 20345439.55 | 0.4831 | 140643473.59 | 0.0699     | 1.0094       | 0.1447     | 1.8939       |
| 5    | 695m 100 ug                   | 9758410.89  | 10765738.7  | 0.9064 | 140944871.31 | 0.0692     | 1.0000       | 0.0764     | 1.0000       |
| 6    | 695mng 75 ug                  | 24498140.5  | 13904241.39 | 1.7619 | 101781332.25 | 0.2407     | 3.4764       | 0.1366     | 1.7885       |
| 7    | 814m 50 ug                    | 12463607    | 6806085.12  | 1.8312 | 104966842.23 | 0.1187     | 1.7150       | 0.0648     | 0.8489       |
| 8    | 814m 100 ug                   | 16093782.9  | 8548478.6   | 1.8826 | 115178915.43 | 0.1397     | 2.0182       | 0.0742     | 0.9717       |
| 9    | 814mng 50 ug                  | 23626840.69 | 7849852.8   | 3.0098 | 65882296.39  | 0.3586     | 5.1797       | 0.1191     | 1.5599       |

|      |                               | Gel 2       |             |        |             |            |              |            |              |
|------|-------------------------------|-------------|-------------|--------|-------------|------------|--------------|------------|--------------|
| Lane | Sample ID and protein loading | PR-A        | PR-B        | PR-A/B | GAPDH       | PR-A/GAPDH | Rel to 695m* | PR-B/GAPDH | Rel to 695m* |
| 1    | 796m 50 ug                    | 6186426.29  | 10756248.49 | 0.5751 | 60174964.88 | 0.1028     | 1.3295       | 0.1787     | 1.6210       |
| 2    | 796m 100 ug                   | 7657501     | 19080076.27 | 0.4013 | 84974350.35 | 0.0901     | 1.1654       | 0.2245     | 2.0362       |
| 3    | 738m 50 ug                    | 5083154.21  | 11083974.01 | 0.4586 | 58900773.53 | 0.0863     | 1.1160       | 0.1882     | 1.7065       |
| 4    | 738m 75 ug                    | 7986176.14  | 14340155.37 | 0.5569 | 66463896.55 | 0.1202     | 1.5539       | 0.2158     | 1.9566       |
| 5    | 695m 100 ug                   | 5927388.2   | 8452716     | 0.7012 | 76652157.46 | 0.0773     | 1.0000       | 0.1103     | 1.0000       |
| 6    | 768m 50 ug                    | 8871388.76  | 12244426.93 | 0.7245 | 63809495.22 | 0.1390     | 1.7979       | 0.1919     | 1.7401       |
| 7    | 768m 100 ug                   | 11448457.84 | 14597983.33 | 0.7842 | 75027610.66 | 0.1526     | 1.9733       | 0.1946     | 1.7644       |
| 8    | 761m 50 ug                    | 6927705.8   | 13774506.88 | 0.5029 | 89489020.48 | 0.0774     | 1.0011       | 0.1539     | 1.3958       |
| 9    | 761m 75 ug                    | 6637777.21  | 12405134.54 | 0.5351 | 107121560.1 | 0.0620     | 0.8013       | 0.1158     | 1.0502       |

|      |                               | Gel 3       |            |        |             |            |              |            |              |
|------|-------------------------------|-------------|------------|--------|-------------|------------|--------------|------------|--------------|
| Lane | Sample ID and protein loading | PR-A        | PR-B       | PR-A/B | GAPDH       | PR-A/GAPDH | Rel to 695m* | PR-B/GAPDH | Rel to 695m* |
| 1    | 763m 50 ug                    | 7142876.23  | 7124209.11 | 1.0026 | 67674251.14 | 0.1055     | 2.0004       | 0.1053     | 3.9329       |
| 2    | 763m 75 ug                    | 8513478.84  | 7887881.03 | 1.0793 | 65839263.41 | 0.1293     | 2.4507       | 0.1198     | 4.4758       |
| 3    | 799m 50 ug                    | 10049102.07 | 5806738.05 | 1.7306 | 60418812.78 | 0.1663     | 3.1522       | 0.0961     | 3.5905       |
| 4    | 799m 75 ug                    | 9034887.64  | 5885672.15 | 1.5351 | 71959099.06 | 0.1256     | 2.3796       | 0.0818     | 3.0557       |
| 5    | 695m 100 ug                   | 4053368.03  | 2056289.29 | 1.9712 | 76821032.00 | 0.0528     | 1.0000       | 0.0268     | 1.0000       |
| 6    | 808m 50 ug                    | 3453969.93  | 3440446.91 | 1.0039 | 65660041.90 | 0.0526     | 0.9970       | 0.0524     | 1.9575       |
| 7    | 808m 75 ug                    | 4664238.71  | 5929009.69 | 0.7867 | 74899369.74 | 0.0623     | 1.1802       | 0.0792     | 2.9573       |
| 8    | 822m 50 ug                    | 3163425     | 3632287.14 | 0.8709 | 68559633.20 | 0.0461     | 0.8745       | 0.0530     | 1.9793       |
| 9    | 822m 100 ug                   | 6314042.45  | 3710042.92 | 1.7019 | 92237491.84 | 0.0685     | 1.2974       | 0.0402     | 1.5027       |

|      |                               | Gel 4      |            |        |              |            |              |            |              |
|------|-------------------------------|------------|------------|--------|--------------|------------|--------------|------------|--------------|
| Lane | Sample ID and protein loading | PR-A       | PR-B       | PR-A/B | GAPDH        | PR-A/GAPDH | Rel to 695m* | PR-B/GAPDH | Rel to 695m* |
| 1    | 857m 50 ug                    | 8329619.8  | 7077623.41 | 1.1769 | 81940191.18  | 0.1017     | 1.6640       | 0.0864     | 1.4448       |
| 2    | 857m 100 ug                   | 6865732.17 | 9344759.51 | 0.7347 | 108659144.13 | 0.0632     | 1.0343       | 0.0860     | 1.4385       |
| 3    | 857mng 50 ug                  | 3458225.75 | 6491986.28 | 0.5328 | 69685468.38  | 0.0496     | 0.8125       | 0.0932     | 1.5583       |
| 4    | 857mng 75 ug                  | 5849951.02 | 7486470.18 | 0.7814 | 84461848.89  | 0.0693     | 1.1337       | 0.0886     | 1.4826       |
| 5    | 695m 100 ug                   | 7032309.65 | 6881750.43 | 1.0219 | 115110824.03 | 0.0611     | 1.0000       | 0.0598     | 1.0000       |
| 6    | 863m 50 ug                    | 4808891    | 7579454.5  | 0.6345 | 87126363.19  | 0.0552     | 0.9035       | 0.0870     | 1.4551       |
| 7    | 863m 100 ug                   | 9539550.22 | 9412707.05 | 1.0135 | 121217360.56 | 0.0787     | 1.2882       | 0.0777     | 1.2989       |
| 8    | 865m 50 ug                    | 4160794.51 | 7785861.8  | 0.5344 | 94837117.41  | 0.0439     | 0.7182       | 0.0821     | 1.3732       |
| 9    | 865m 100 ug                   | 7761297    | 6811969.69 | 1.1394 | 136636356.70 | 0.0568     | 0.9298       | 0.0499     | 0.8339       |

\*, sample used as calibrator

Estrogen Receptor (ESR1, arbitrary densitometric units)

|      |                               | Gel 1       |              |            |               |
|------|-------------------------------|-------------|--------------|------------|---------------|
| Lane | Sample ID and protein loading | ESR1        | GAPDH        | ESR1/GAPDH | Rel to MCF-7* |
| 1    | 796m 25ug                     | 7390732.75  | 121336193.62 | 0.0609     | 0.0346        |
| 2    | 796m 25ug                     | 7791337.67  | 119594737.24 | 0.0651     | 0.0370        |
| 3    | 738m 25ug                     | 7140513.94  | 106916419.98 | 0.0668     | 0.0379        |
| 4    | 738m 25ug                     | 7857750.34  | 97552803.37  | 0.0805     | 0.0457        |
| 5    | MCF-7 10ug                    | 16359478.48 | 63305049.78  | 0.2584     | 0.1467        |
| 6    | 695m 25ug                     | 8607812.19  | 100847157.45 | 0.0854     | 0.0484        |
| 7    | 695m 25ug                     | 6659602.28  | 101599797.82 | 0.0655     | 0.0372        |
| 8    | 814m 25ug                     | 4870565.46  | 96016249.70  | 0.0507     | 0.0288        |
| 9    | 814m 25ug                     | 5913318.04  | 116115103.37 | 0.0509     | 0.0289        |

|      |                               | Gel 2       |              |            |               |
|------|-------------------------------|-------------|--------------|------------|---------------|
| Lane | Sample ID and protein loading | ESR1        | GAPDH        | ESR1/GAPDH | Rel to MCF-7* |
| 1    | 734m 25ug                     | 12747404.71 | 72728429.03  | 0.1753     | 0.2419        |
| 2    | 734m 25ug                     | 14568602.57 | 71982802.94  | 0.2024     | 0.2793        |
| 3    | 865m 25ug                     | 10423503.50 | 87754275.99  | 0.1188     | 0.1639        |
| 4    | 865m 25ug                     | 10483470.00 | 91642386.75  | 0.1144     | 0.1579        |
| 5    | MCF-7 10ug                    | 10313898.22 | 54137027.27  | 0.1905     | 0.2630        |
| 6    | 795m 25ug                     | 2128556.60  | 74927042.60  | 0.0284     | 0.0392        |
| 7    | 795m 25ug                     | 1520347.49  | 77824725.51  | 0.0195     | 0.0270        |
| 8    | 761m 25ug                     | 5666200.60  | 91376353.71  | 0.0609     | 0.0841        |
| 9    | 761m 25ug                     | 6346252.84  | 121075480.42 | 0.0524     | 0.0723        |

|      |                               | Gel 3       |              |            |               |
|------|-------------------------------|-------------|--------------|------------|---------------|
| Lane | Sample ID and protein loading | ESR1        | GAPDH        | ESR1/GAPDH | Rel to MCF-7* |
| 1    | 768m 25ug                     | 13169309.37 | 83988965.10  | 0.1568     | 0.1562        |
| 2    | 768m 25ug                     | 12921490.96 | 79287104.00  | 0.1630     | 0.1623        |
| 3    | 763m 25ug                     | 2696328.78  | 82335385.22  | 0.0327     | 0.0326        |
| 4    | 763m 25ug                     | 2593776.19  | 86928202.50  | 0.0298     | 0.0297        |
| 5    | MCF-7 10ug                    | 11840984.64 | 61599990.61  | 0.1922     | 0.1915        |
| 6    | 799m 25ug                     | 3662505.40  | 97561931.70  | 0.0375     | 0.0374        |
| 7    | 799m 25ug                     | 3293117.99  | 85480994.60  | 0.0385     | 0.0384        |
| 8    | 808m 25ug                     | 3475556.19  | 102264821.93 | 0.0340     | 0.0339        |
| 9    | 808m 25ug                     | 3203779.17  | 139946449.00 | 0.02       | 0.02          |

|      |                                     | Gel 4       |              |            |               |
|------|-------------------------------------|-------------|--------------|------------|---------------|
| Lane | Sample ID and protein loading       | ESR1        | GAPDH        | ESR1/GAPDH | Rel to MCF-7* |
| 1    | 857m 25ug                           | 4690397.00  | 122054851.00 | 0.0384     | 0.0492        |
| 2    | 857m 25ug                           | 6419097.38  | 111176354.69 | 0.0577     | 0.0739        |
| 3    | MCF-7 10ug                          | 13133880.14 | 68426013.28  | 0.1919     | 0.2456        |
| 4    | MCF-7 10ug (not used as calibrator) |             |              |            |               |
| 5    | 863m 25ug                           | 3039162.43  | 120722993.62 | 0.0252     | 0.0322        |
| 6    | 863m (assay failure)                |             |              |            |               |
| 7    | 822m (assay failure)                |             |              |            |               |
| 8    | 822m 25ug                           | 3743355.44  | 92302077.99  | 0.0406     | 0.0519        |

\*, MCF-7 cell extract used as calibrator
